# Supplementary material for: A novel, concise and efficient protocol for non-natural piperidine compounds
Source: Royal Society of Chemistry journal article supplement (doi:10.1039/c4ra04558k), 2014-07-18
Supplement: c4ra04558k1.pdf [file c4ra04558k1.pdf]

## **“A novel, concise and efficient protocol for non natural piperidine compounds”**

Subhash P. Chavan,\* Nilesh B. Dumare and Kailash P. Pawar

*Division of Organic Chemistry, CSIR-NCL (National Chemical Laboratory), Pune-411008, India*

*sp.chavan@ncl.res.in*

### **Supporting Information:**

#### **Table of Contents**

|           |                                                         |
|-----------|---------------------------------------------------------|
| SI:-2     | General                                                 |
| SI:-3-9   | Experiemental                                           |
| SI:-10-24 | NMR spectra: copies of $^1\text{H}$ and $^{13}\text{C}$ |
| SI:-25-27 | HPLC chromatograms                                      |

**General:**

Melting points are recorded using Buchi B-540 or M-560 melting point apparatus in capillary tubes and are uncorrected and the temperatures are in centigrade scale. IR spectra were recorded on a Perkin-Elmer Infrared Spectrophotometer Model 68B or on a Perkin-Elmer 1615 FT Infrared spectrophotometer.  $^1\text{H}$  (200 and 400 MHz) and  $^{13}\text{C}$  (50 and 100 MHz) NMR spectra were recorded on Bruker and Bruker Advance 400 spectrometers. The chemical shifts ( $\delta$  ppm) and coupling constants (Hz) are reported in the standard fashion with reference to chloroform,  $\delta$  7.27 (for  $^1\text{H}$ ) or the central line (77.0 ppm) of  $\text{CDCl}_3$  (for  $^{13}\text{C}$ ). In the  $^{13}\text{C}$  NMR spectra, the nature of the carbons (C, CH,  $\text{CH}_2$ , or  $\text{CH}_3$ ) was determined by recording the DEPT-135 spectra. The reaction progress was monitored by the TLC analysis using thin layer plates precoated with silica gel 60 F254 (Merck) and visualized by fluorescence quenching or iodine or by charring after treatment with *p*-anisaldehyde. Merck's flash silica gel (300-400 mesh) was used for column chromatography. All small scale dry reactions were carried out using standard syringe-septum technique. Low temperature reactions were carried out using a bath made of sodium chloride and ice. Dry THF was obtained by distillation over sodium/benzophenone ketyl. Dry DCM was prepared by distillation over phosphorous pentoxide or calcium hydride. Dry benzene was obtained by distillation over sodium. All other reagents and solvents were used as received from the manufacturer, unless otherwise specified. All air and water sensitive reactions were performed in flasks flame dried under positive flow of argon and conducted under an argon atmosphere.

## Experimental:

### (*R*)-*tert*-Butyl 2-(benzyloxymethyl)-5,6-dihydropyridine-1(2*H*)-carboxylate (**16**)

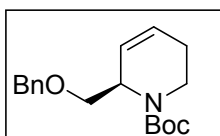

A mixture of alcohol **9** (0.5 g, 1.55 mmol), PPh<sub>3</sub> (1.34 g, 5.11 mmol), imidazole (0.33 g, 4.96 mmol) and I<sub>2</sub> (0.86 g, 3.41 mmol) in anhydrous toluene (10 mL) was refluxed under nitrogen atmosphere for 30 minutes. After completion of the reaction (TLC), the reaction mixture was diluted with ethyl acetate (60 mL) and washed with Na<sub>2</sub>S<sub>2</sub>O<sub>3</sub> solution, water, followed by brine. The organic solvent was dried over anhydrous sodium sulphate, filtered and concentrated under reduced pressure. The residue was purified on silica gel by eluting with light petroleum: EtOAc (9:1) to afford **16** as colorless syrup (0.40 g, 85% yield).

Yield : 85%; [ $\alpha$ ]<sub>D</sub><sup>25</sup> : +106.31 (c 1.9, CHCl<sub>3</sub>); IR (CHCl<sub>3</sub>, cm<sup>-1</sup>) : 1692, 1418, 1172; <sup>1</sup>H NMR (200 MHz, CDCl<sub>3</sub>):  $\delta$  1.45 (s, 9H), 1.88-2.04 (m, 1H), 2.13-2.30 (m, 1H), 2.94 (bs, 1H), 3.47-3.61 (m, 2H), 4.15 (bs, 1H), 4.49-4.66 (m, 3H), 5.70-5.79 (m, 1H), 5.90-5.98 (m, 1H), 7.23-7.35 (m, 5H); <sup>13</sup>C NMR (50 MHz, CDCl<sub>3</sub>+CCl<sub>4</sub>):  $\delta$  24.9, 28.5, 71.3, 73.0, 79.5, 126.7, 127.4, 128.3, 138.3, 154.5; ESIMS (*m/z*): 326.28(M+Na)<sup>+</sup>; HRMS calculated for [C<sub>18</sub>H<sub>25</sub>NO<sub>3</sub>+Na]<sup>+</sup> 326.1727; found: 326.1734.

### (*R*)-*tert*-Butyl 2-(hydroxymethyl)-5,6-dihydropyridine-1(2*H*)-carboxylate (**8**)

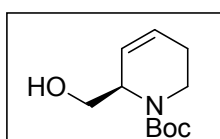

Benzyl ether **16** (0.100 g, 0.33 mmol, 1.0 eq.) was stirred in anhydrous THF (5 ml) at -78 °C under an atmosphere of nitrogen. Ammonia gas was condensed (3 mL) by passing into the precooled dewar flask, fitted with a dewar condenser (-78 °C). Sodium (0.023 g, 0.99 mmol, 3.0 eq.) was added and the deep blue mixture stirred for 10 min at -78 °C. After 10 min, solid ammonium chloride (5 g) was added to the reaction mixture. Ammonia was then allowed to evaporate by removing the cooling bath, and the product was extracted with ethyl acetate (4 x 50 mL). The organic layers were dried over anhydrous sodium sulfate, filtered and concentrated under reduced pressure to yield the crude product as yellow syrup. The residue was purified on silica gel by eluting with light petroleum: EtOAc (7:3) to afford homoallylic alcohol **8** as colorless oil (0.061 g, 88%).

Yield : 88%;  $[\alpha]_{\text{D}}^{25}$  : +200 (c 0.6, CHCl<sub>3</sub>); lit.<sup>6</sup> For comp-16  $[\alpha]_{\text{D}}^{24}$  +230.7 (c 1.75, CHCl<sub>3</sub>);

IR (CHCl<sub>3</sub>, cm<sup>-1</sup>) : 3440, 2975, 1693, 1674, 1423; <sup>1</sup>H NMR (500 MHz, CDCl<sub>3</sub>): δ 1.47 (s, 9H), 1.95-2.00 (m, 1H), 2.16-2.26 (m, 1H), 2.95 (br, 1H), 3.64 (m, 1H), 3.68-3.70 (m, 1H), 4.08 (bs, 1H), 4.53 (bs, 1H), 5.62 (dt, *J* = 10, 2.9 Hz, 1H), 5.95 (m, 1H); <sup>13</sup>C NMR (125 MHz, CDCl<sub>3</sub>+CCl<sub>4</sub>): δ 24.9, 28.5, 38.1, 54.3, 64.9, 80.1, 124.8, 127.8, 156.2; ESIMS (*m/z*): 236.1 (M+Na)<sup>+</sup>.

### (*R*)-*tert*-Butyl 2-(hydroxymethyl)piperidine-1-carboxylate (17)

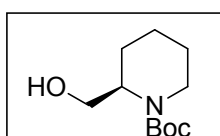

Olefin **8** (0.100 g, 0.46 mmol) and 10 % Pd/C in methanol (5 ml) were subjected under hydrogen atmosphere at 30 *psi* at room temperature (25 °C) for 3 h. The reaction mixture was filtered through celite and the celite layer was washed thoroughly with methanol (2 X 20 mL) and concentrated under reduced pressure. The residue thus obtained was purified by flash silica gel column chromatography using light petroleum: ethyl acetate (1:1) as an eluent to furnish alcohol **17** (0.092 g, 92% yield) as a colorless liquid.

Yield : 92%;  $[\alpha]_{\text{D}}^{25}$  : +38.9 (c 1, CHCl<sub>3</sub>); lit.<sup>8</sup> for *ent*-20 -40.1 (c 1, CHCl<sub>3</sub>); IR (CHCl<sub>3</sub>, cm<sup>-1</sup>): 3442, 2940, 2890, 1655, 1422, 1370, 1280, 1170, 1150, 1060; <sup>1</sup>H NMR (200 MHz, CDCl<sub>3</sub>): δ 1.46 (s, 9H), 1.55-1.68 (m, 4H), 2.11 (bs, 2H), 2.87 (m, 1H), 3.59 (dd, *J* = 10, 6 Hz, 1H), 3.75-3.85 (m, 1H), 3.93 (d, *J* = 12 Hz, 1H), 4.72-4.85 (m, 1H); <sup>13</sup>C NMR (50 MHz, CDCl<sub>3</sub>+CCl<sub>4</sub>): δ 19.31, 24.8, 25.2, 28.3, 39.8, 52.1, 60.1, 79.5, 155.8; HRMS calculated for [C<sub>11</sub>H<sub>21</sub>NO<sub>3</sub>+H]<sup>+</sup> 216.1594; found: 216.1600.

### (*S*)-*tert*-Butyl 2-((benzyloxy)methyl)-3-oxopiperidine-1-carboxylate (18)

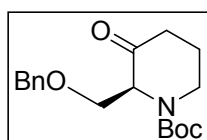

To a solution of alcohol **9** (0.100 g, 0.311 mmol) in ethyl acetate (5 mL) was added IBX (0.17 g, 0.622 mmol) at room temperature under nitrogen atmosphere. The reaction mixture was allowed to reflux for 3 h. After completion of reaction (monitored by TLC), the reaction mixture was allowed to cool at room temperature. The reaction mixture was filtered through a Whatmann filter paper. The combined organic layer was washed with saturated solution of NaHCO<sub>3</sub> (20 mL) followed by water (30 mL). The organic layer was dried over anhydrous sodium sulphate, filtered and concentrated under reduced pressure to provide crude residue. The residue was purified by

flash silica gel column chromatography using ethyl acetate and pet ether (3: 7) as an eluent to give keto carbamate **18** as colorless syrup (0.89 g, 90% ).

Yield : 90%;  $[\alpha]_{\text{D}}^{25}$  : +30.2 (c 1.27, CHCl<sub>3</sub>); IR (CHCl<sub>3</sub>, cm<sup>-1</sup>): 1717, 1693, 1404, 1117; <sup>1</sup>H NMR (200 MHz, CDCl<sub>3</sub>):  $\delta$  1.50 (s, 9H), 1.89-2.17 (m, 2H), 2.45-2.60 (m, 2H), 3.49 (bs, 1H), 3.69-4.32 (m, 3H), 4.52 (s, 2H), 4.63 (bs, 1H), 7.25-7.42 (m, 5H); <sup>13</sup>C NMR (50 MHz, CDCl<sub>3</sub>+CCl<sub>4</sub>):  $\delta$  22.1, 28.5, 38.8, 72.3, 73.4, 80.2, 127.4, 127.7, 128.5, 207.2.

### (2S,3S)-*tert*-Butyl 2-((benzyloxy)methyl)-3-hydroxypiperidine-1-carboxylate (**19**)

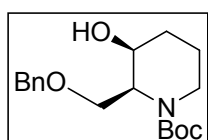

To a solution of keto carbamate **18** (0.1 g, 0.313 mmol) in methanol (5 mL) was added NaBH<sub>4</sub> (23.6 mg, 0.626 mmol) at 0 °C portionwise. The reaction mixture was allowed to stir for 30 min at room temperature. After completion of reaction, the reaction mixture was concentrated under reduced pressure. The aq. solution of NH<sub>4</sub>Cl was added to the semisolid mass and allowed to stir for 30 min and the reaction mixture was extracted with DCM (3 X 30 mL). The combined organic layer was dried over anhydrous sodium sulphate, filtered and concentrated under reduced pressure to afford a residue. The residue was purified by flash silica gel column chromatography using ethyl acetate and pet. ether as an eluent to provide *cis* alcohol **19** (88.5 mg, 88%) as colorless syrup.

Yield : 88%;  $[\alpha]_{\text{D}}^{25}$  : +36.8 (c 0.5, CHCl<sub>3</sub>); lit. <sup>1</sup> for *ent*-17  $[\alpha]_{\text{D}}^{23}$  -38.9 (c = 0.76, CHCl<sub>3</sub>).

<sup>1</sup>H NMR (200 MHz, CDCl<sub>3</sub>):  $\delta$  1.44 (s, 9H), 1.48-1.94 (m, 4H), 2.66 (br *t*, 1H), 3.61-3.69 (m, 1H), 3.76-3.97 (m, 3H), 4.53 (d, *J* = 1.5 Hz, 2H), 4.58-4.70 (m, 1H), 7.30 (s, 5H); <sup>13</sup>C (100 MHz, CDCl<sub>3</sub>+CCl<sub>4</sub>):  $\delta$  24.0, 28.5, 28.8, 39.2, 53.2, 66.6, 69.5, 73.3, 79.8, 127.7, 127.8, 128.5, 137.7, 154.9; HRMS calculated for [C<sub>18</sub>H<sub>27</sub>NO<sub>4</sub>+H]<sup>+</sup> 322.2013; found: 322.2008.

### *tert*-Butyl 6-((benzyloxy)methyl)-3,4-dihydropyridine-1(2*H*)-carboxylate (**20**)

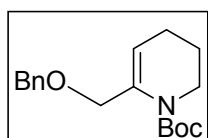

A mixture of alcohol **19** (0.05 g, 0.155 mmol), PPh<sub>3</sub> (0.134 g, 0.511 mmol), imidazole (0.033 g, 0.496 mmol) and I<sub>2</sub> (0.086 g, 0.341 mmol) in anhydrous toluene (10 mL) was refluxed under nitrogen atmosphere for 30 minutes. After completion of the reaction (TLC), the reaction mixture was diluted with ethyl acetate (60 mL) and washed with Na<sub>2</sub>S<sub>2</sub>O<sub>3</sub> solution followed by water. The organic layer was dried over anhydrous sodium sulphate, filtered and concentrated under reduced

pressure. The residue was purified on silica gel by eluting with light petroleum: EtOAc (9:1) to afford olefin **20** (0.011 g) and olefin **16** (0.017 g) in 60% yield.

Yield : 24%; IR (CHCl<sub>3</sub>, cm<sup>-1</sup>): 1698, 1654, 1400, 1162; <sup>1</sup>H NMR (200 MHz, CDCl<sub>3</sub>): δ 1.48 (s, 9H), 1.78-1.81 (m, 2H), 2.09-2.18 (m, 2H), 3.50-3.57 (m, 2H), 4.33 (s, 2H), 4.48 (s, 2H), 5.27 (t, J = 3.5 Hz, 1H), 7.30-7.33 (m, 5H); <sup>13</sup>C NMR (100 MHz, CDCl<sub>3</sub>+CCl<sub>4</sub>): δ 22.9, 23.5, 28.4, 44.4, 71.5, 71.9, 80.0, 112.9, 127.5, 127.8, 128.3, 136.8, 138.5, 153.; ; ESIMS (*m/z*): 326.28 (M+Na)<sup>+</sup>; HRMS calculated for [C<sub>18</sub>H<sub>25</sub>NO<sub>3</sub> +Na]<sup>+</sup> 326.1727 found: 326.1734.

**(2R,5S)-tert-Butyl 2-(benzyloxymethyl)-5-hydroxy-5,6-dihydropyridine-1(2H)-carboxylate (21)**

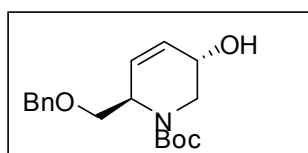

To the solution of alkene **16** (0.100 g, 0.33 mmol) in dry 1,4-dioxane (20 mL) was added SeO<sub>2</sub> (0.054 g, 0.49 mmol). The reaction mixture was stirred for 3 h under reflux. After completion of reaction (monitored by TLC), the reaction mixture was allowed to cool at room temperature. The reaction mixture was filtered through a celite bed and the residue was washed with 1,4-dioxane (5 X 10 mL). The filtrate was concentrated *in vacuo* and the obtained residue was dissolved in ethyl acetate (30 mL). The organic layer was washed with saturated NaHCO<sub>3</sub> solution followed by water. The organic extract was dried over anhydrous Na<sub>2</sub>SO<sub>4</sub>, filtered and concentrated under reduced pressure to afford crude product. The crude residue was purified by flash silica gel column chromatography using 25% ethyl acetate in petroleum ether as an eluent to afford pure product **21** as colorless oil (0.031 g, 30%).

Yield: 30% [ $\alpha$ ]<sup>25</sup> : +284.94 (c 0.97, CHCl<sub>3</sub>); For compound 20 lit.<sup>10</sup>[ $\alpha$ ]<sup>20</sup> +270 (c 1.0, CHCl<sub>3</sub>); IR (CHCl<sub>3</sub>, cm<sup>-1</sup>): 3421, 1690, 1171; found: 342.1690; <sup>1</sup>H NMR (400 MHz, CDCl<sub>3</sub>): δ 1.46 (s, 9H), 3.06-3.29 (m, 1H), 3.53 (bs, 2H), 3.98-4.31 (m, 2H), 4.49 (d, J = 12 Hz, 1H), 4.54 (d, J = 12 Hz, 1H), 4.60-4.70 (m, 1H), 5.92-5.96 (m, 1H), 6.06-7.10 (m, 1H), 7.26-7.34 (m, 5H); <sup>13</sup>C NMR (100 MHz, CDCl<sub>3</sub>+CCl<sub>4</sub>): δ 28.46, 62.9, 70.3, 73.2, 80.1, 127.5, 127.7, 128.4, 138.1; ESIMS (*m/z*) : 342.1 (M+Na)<sup>+</sup>; HRMS calculated for [C<sub>18</sub>H<sub>25</sub>NO<sub>4</sub>+Na]<sup>+</sup> 342.1676.

**(2R,5S)-tert-Butyl 2-((benzyloxy)methyl)-5-((tert-butyldiphenylsilyl)oxy)-5,6-dihydropyridine-1(2H)-carboxylate (22)**

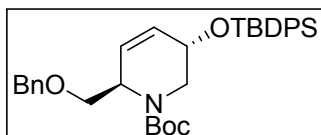

To a solution of alcohol **21** (0.020 g, 0.062 mmol) in anhydrous DCM (5 mL) was added imidazole (0.0085 g, 0.124 mmol) followed by addition of TBDPSCl (0.024 mL, 0.093 mmol) and DMAP (cat.) at 0 °C under nitrogen atmosphere. The reaction was allowed to stir at room temperature for 15 h. After completion of reaction (monitored by TLC), the reaction mixture was diluted with water (30 mL) and extracted with DCM (3 X 30 mL). The combined organic layer was dried over anhydrous sodium sulphate, filtered and concentrated under reduced pressure. The residue was purified by flash silica gel column chromatography using ethyl acetate: pet. ether (5: 95) as an eluent to afford TBS ether as colorless syrup **22** (0.020 g, 60%).

Yield : 60%;  $[\alpha]_{\text{D}}^{25}$  : +170 (c 0.7, CHCl<sub>3</sub>), lit.<sup>11</sup> for *ent*-**21**  $[\alpha]_{\text{D}}^{21}$  -178 (c 1, CHCl<sub>3</sub>);

IR (CHCl<sub>3</sub>, cm<sup>-1</sup>) : 1695, 1417, 1111; <sup>1</sup>H NMR (500 MHz, CDCl<sub>3</sub>): δ 1.05 (s, 9H), 1.49 (s, 9H), 2.76- 3.15 (m, 1H), 3.51 (s, 2H), 4.06 (s, 1H), 4.12- 4.41 (m, 1H), 4.47 (d, *J* = 12.2 Hz, 1H), 4.52 (d, *J* = 12.2 Hz, 1H), 4.55- 4.85 (m, 1H), 5.66 (bs, 1H), 5.81 (dd, *J* = 10.1, 3.8 Hz, 1H), 7.23- 7.31 (m, 5H), 7.32- 7.44 (m, 6H), 7.66 (d, *J* = 6.6 Hz, 2H), 7.72 (d, *J* = 6.8 Hz, 2H); <sup>13</sup>C NMR (125 MHz, CDCl<sub>3</sub>+CCl<sub>4</sub>): δ 19.3, 26.9, 28.5, 63.9, 70.6, 73.0, 79.5, 127.4, 127.5, 127.7, 128.3, 129.6, 129.7, 133.9, 135.8, 138.2, 154.9.

#### **(R)-tert-Butyl 2-(benzyloxymethyl)-5-oxo-5,6-dihydropyridine-1(2H)-carboxylate (24)**

To a solution of alcohol **21** (0.030 g, 0.094 mmol) in ethyl acetate (5 mL) was added IBX (0.052 g, 0.19 mmol). The reaction mixture was refluxed for 2h.

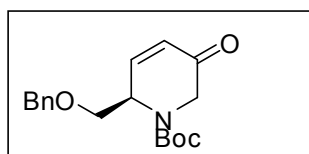

After completion of reaction, the reaction mixture was allowed to cool to room temperature. The reaction mixture was filtered through a Whatman filter paper and the residue was washed with ethyl acetate (3 X 10 mL). The combined organic layer was washed with NaHCO<sub>3</sub>, dried over anhydrous sodium sulphate, filtered and concentrated under reduced pressure to obtain crude enone. The residue thus obtained was purified by flash silica gel column chromatography using light petroleum: ethyl acetate (8:2) as an eluent to furnish colorless enone compound **24** (0.026 g, 90% yield).

Yield: 90%;  $[\alpha]_{\text{D}}^{25}$  : +119.4 (c 0.94, CHCl<sub>3</sub>); IR (CHCl<sub>3</sub>, cm<sup>-1</sup>): 3020, 1705, 1693, 1150;

$^1\text{H}$  NMR (200 MHz,  $\text{CDCl}_3$ ):  $\delta$  1.46 (s, 9H), 3.61-3.91 (m, 3H), 4.45-4.58 (m, 3H), 4.91 (bs, 1H), 6.20 (dd,  $J = 10, 1.5$  Hz, 1H), 6.99 (dd,  $J = 10, 5$  Hz, 1H), 7.22-7.33 (m, 5H);  $^{13}\text{C}$  (100 MHz,  $\text{CDCl}_3 + \text{CCl}_4$ ):  $\delta$  28.4, 70.1, 73.3, 80.9, 127.2, 127.5, 127.8, 128.3, 128.4, 128.5, 193.1; ESIMS ( $m/z$ ): 340.3 ( $\text{M} + \text{Na}$ ) $^+$ .

**(2*R*,5*R*)-*tert*-Butyl 2-(benzyloxymethyl)-5-hydroxy-5,6-dihydropyridine-1(2*H*)-carboxylate (23)**

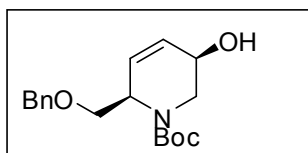

To a stirred solution of enone **24** (0.025 g, 0.078 mmol) and cerium chloride heptahydrate (0.046 g, 0.18 mmol) in methanol (5 mL) was added sodium borohydride (0.006 g, 0.17 mmol) portion wise at 0 °C. The reaction mixture was stirred for one hour at that temperature, after which  $\text{NH}_4\text{Cl}$  was added to destroy excess  $\text{NaBH}_4$ . All volatiles were evaporated *in vacuo* and the residue was partitioned between water (20 mL) and  $\text{CH}_2\text{Cl}_2$  (20 mL). The aqueous phase was extracted with  $\text{CH}_2\text{Cl}_2$  (2 X 20 mL), the combined organic phase was washed with brine, dried over anhydrous  $\text{Na}_2\text{SO}_4$ , filtered and concentrated *in vacuo* to give the crude alcohol. The residue was purified by flash silica gel column chromatography using light petroleum: ethyl acetate (7:3) as an eluent to furnish colorless alcohol **23** (0.020 g, 80% yield).

Yield : 80%;  $[\alpha]_{\text{D}}^{25}$  : +140.76 ( $c$  0.43,  $\text{CHCl}_3$ ); lit<sup>10</sup> for *ent*-22  $[\alpha]_{\text{D}}^{21}$  -146 ( $c = 1.0$ ,  $\text{CHCl}_3$ );

IR ( $\text{CHCl}_3$ ,  $\text{cm}^{-1}$ ) : 3421, 1696, 1670, 1455, 1416, 1116;  $^1\text{H}$  NMR (500 MHz,  $\text{CDCl}_3 + \text{CCl}_4$ ):  $\delta$  1.45 (s, 9H), 1.97 (s, 1H), 2.85 (bs, 1H), 3.47-3.72 (m, 2H), 4.22 (bs, 2H), 4.45 (bs, 1H), 4.53 (d,  $J = 12$  Hz, 1H), 4.57 (d,  $J = 12$  Hz, 1H), 5.82 (dd,  $J = 10, 3$  Hz, 1H), 5.95 (d,  $J = 10$  Hz, 1H), 7.26-7.35 (m, 5H);  $^{13}\text{C}$  NMR (125 MHz,  $\text{CDCl}_3 + \text{CCl}_4$ ):  $\delta$  28.5, 51.6, 63.7, 70.6, 73.3, 80.1, 127.6, 127.7, 128.4, 131.6, 138.0, 154.4; ESIMS ( $m/z$ ) : 342 ( $\text{M} + \text{Na}$ ) $^+$ ; HRMS calculated for  $[\text{C}_{18}\text{H}_{25}\text{NO}_4 + \text{Na}]^+$  342.1676; found: 342.1690.

**(2*S*,3*S*,4*S*,5*S*)-*tert*-Butyl 2-((benzyloxy)methyl)-5-((*tert*-butyldiphenylsilyl)oxy)-3,4-dihydropiperidine-1-carboxylate (25)**

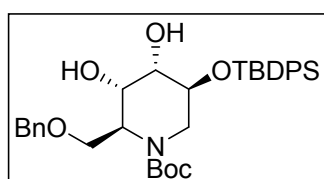

To a solution of alcohol **23** (0.020 g, 0.062 mmol) in anhydrous DCM was added imidazole (0.0085 g, 0.124 mmol) followed by addition of TBDPSCl (0.024 mL, 0.093 mmol) at 0 °C under nitrogen atmosphere. The reaction mixture was allowed to stir at room temperature for 6 h. After completion of reaction (monitored by TLC), reaction mixture was diluted with water. The reaction mixture was extracted with DCM (3 X 30



mL). The combined organic layer was dried over anhydrous sodium sulphate, filtered and concentrated under reduced pressure. The residue was filtered by flash silica gel chromatography using ethyl acetate: pet. ether as an eluent to afford impure TBS ether. To a solution of crude olefin (0.034 mg, 60.95  $\mu\text{mol}$ ) in  $\text{CH}_3\text{CN}$ : EtOAc (2 mL: 2 mL) at 0  $^\circ\text{C}$  was added a solution of  $\text{RuCl}_3\cdot\text{H}_2\text{O}$  (cat.) and  $\text{NaIO}_4$  (19.5 mg, 91.43  $\mu\text{mol}$ ) in distilled water (2 mL). The mixture was stirred vigorously for 2 min. and quenched with saturated aqueous solution of  $\text{Na}_2\text{S}_2\text{O}_3$  (30 mL). The aqueous phase was separated and extracted with EtOAc (3 X 20 mL). The combined organic extracts were dried over anhydrous sodium sulphate, filtered and concentrated under reduced pressure. The residue thus obtained was purified by flash silica gel column chromatography using light pet. ether: ethyl acetate (6:4) as an eluent to furnish colorless alcohol **25** (0.02 g, 54% over two steps).

Yield: 54%; IR ( $\text{CHCl}_3$ ,  $\text{cm}^{-1}$ ): 3434, 2929, 2856, 1693, 1668, 1427, 1111;  $[\alpha]_{\text{D}}^{25}$ : +50 (c 1,  $\text{CHCl}_3$ ), lit.<sup>11</sup> +52 (c 1,  $\text{CHCl}_3$ );  $^1\text{H}$  NMR (500 MHz,  $\text{CDCl}_3+\text{CCl}_4$ ):  $\delta$  1.08 (s, 9H), 1.34 (s, 9H), 2.10 (bs, 1H), 2.25 (s, 1H), 2.49 (s, 1H), 2.83 (bs, 1H), 3.55 (s, 2H), 3.76 (bs, 1H), 3.87- 3.95 (m, 1H), 4.01 (s, 1H), 4.36 (broad s, 1H), 4.48 (d,  $J = 12.0$  Hz, 1H), 4.53 (d,  $J = 12.0$  Hz, 1H), 7.25- 7.45 (m, 11H), 7.63 (d,  $J = 7.6$  Hz, 2H), 7.72 (d,  $J = 7.6$  Hz, 2H);  $^{13}\text{C}$  NMR (125 MHz,  $\text{CDCl}_3+\text{CCl}_4$ ):  $\delta$  19.4, 27.1, 28.4, 29.8, 68.9, 69.7, 69.9, 73.2, 74.1, 79.9, 127.5, 127.7, 127.9, 128.5, 130.1, 133.7, 135.8, 137.9, 155.1.

NMR spectra: copies of  $^1\text{H}$  and  $^{13}\text{C}$

$^1\text{H}$  NMR Spectrum of compound 16 ( $\text{CDCl}_3+\text{CCl}_4$ , 200 MHz)

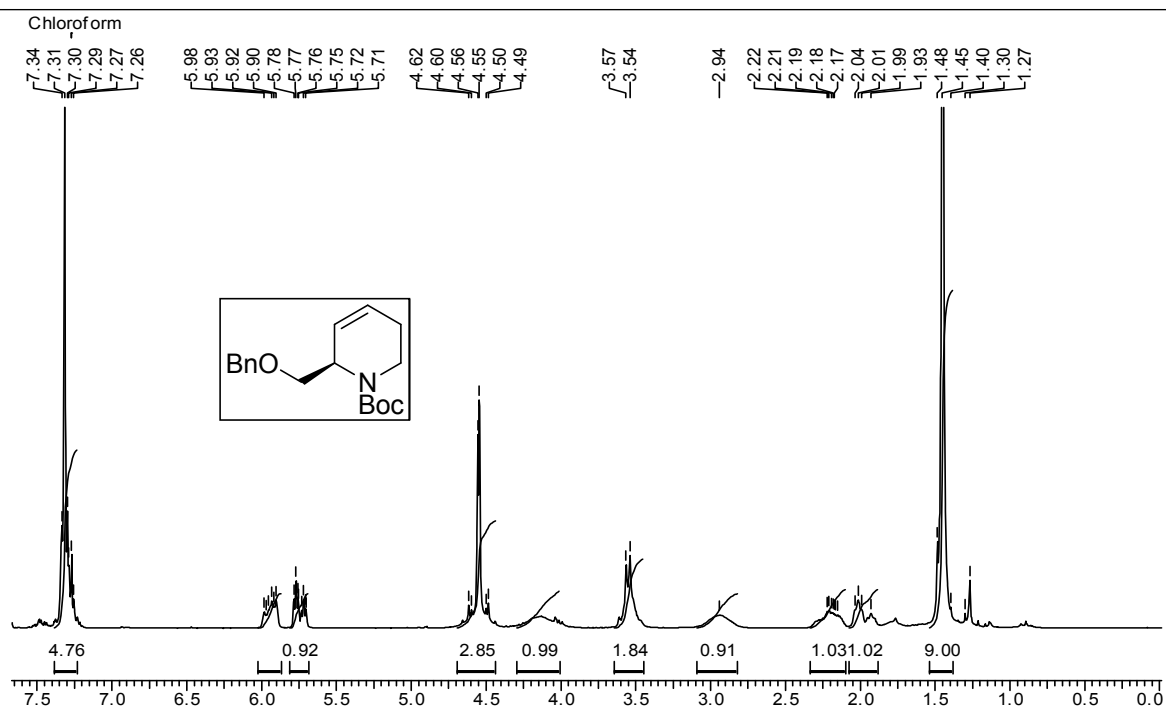

$^{13}\text{C}$  NMR Spectrum of compound 16 ( $\text{CDCl}_3+\text{CCl}_4$ , 50 MHz)

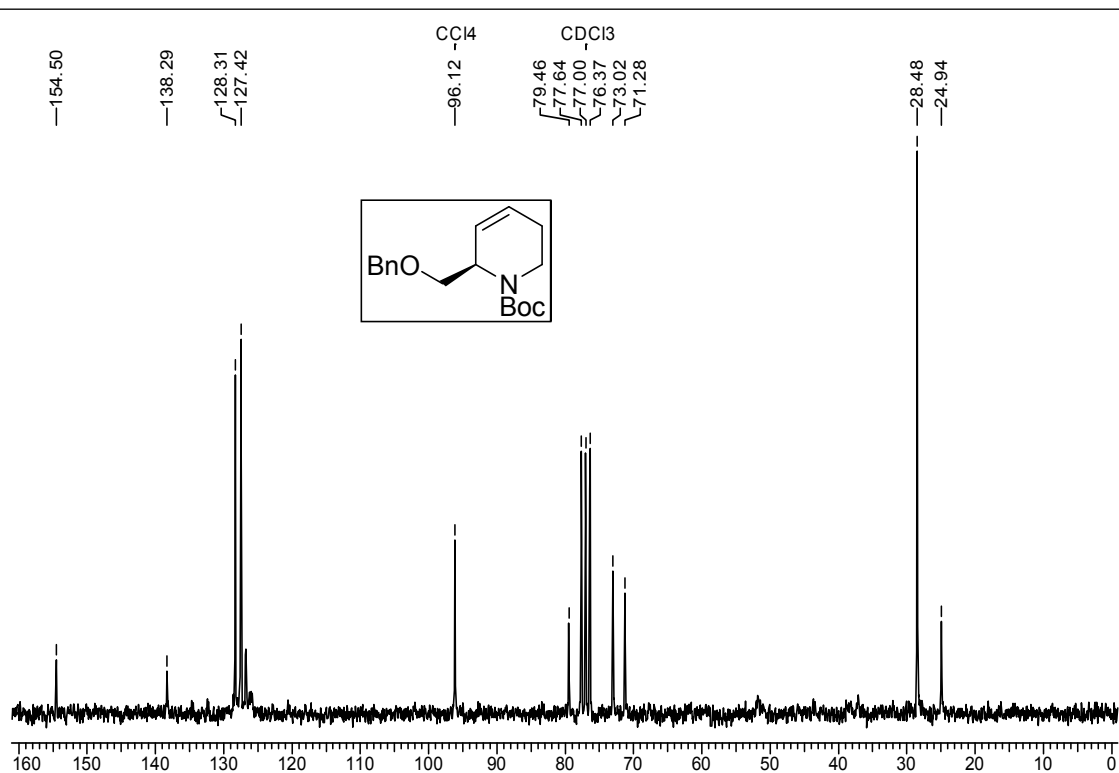

DEPT Spectrum of compound 16 (CDCl<sub>3</sub>+CCl<sub>4</sub>, 50 MHz)

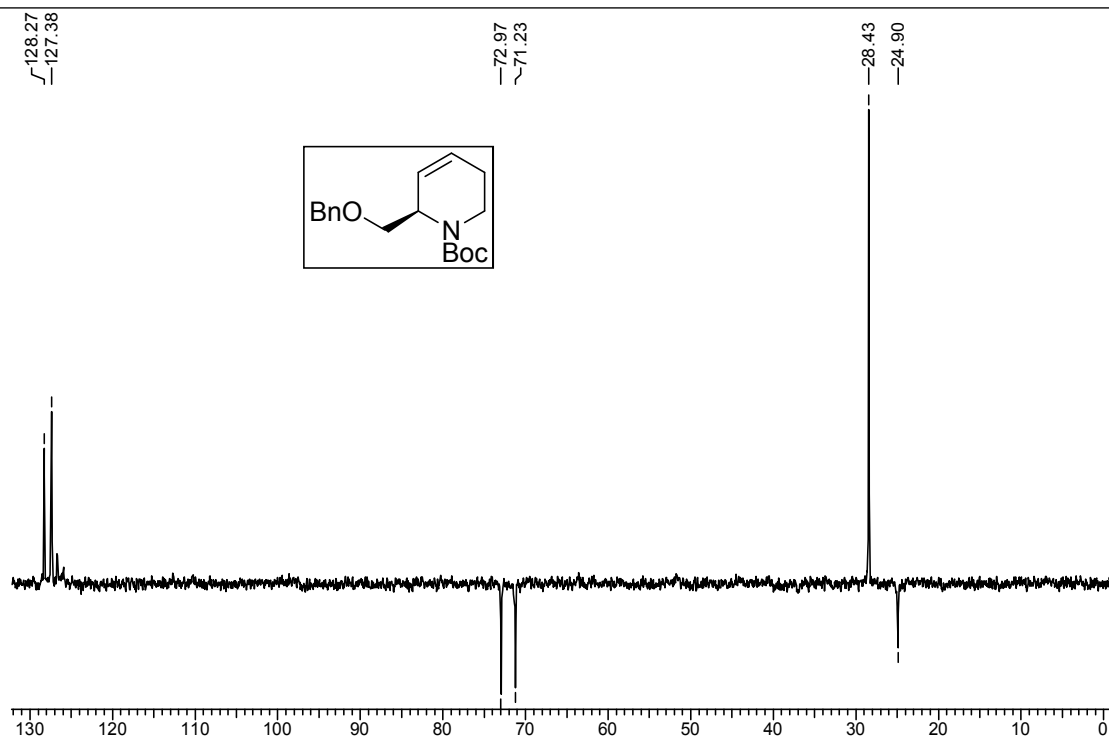

<sup>1</sup>H NMR Spectrum of compound 8 (CDCl<sub>3</sub>+CCl<sub>4</sub>, 500 MHz)

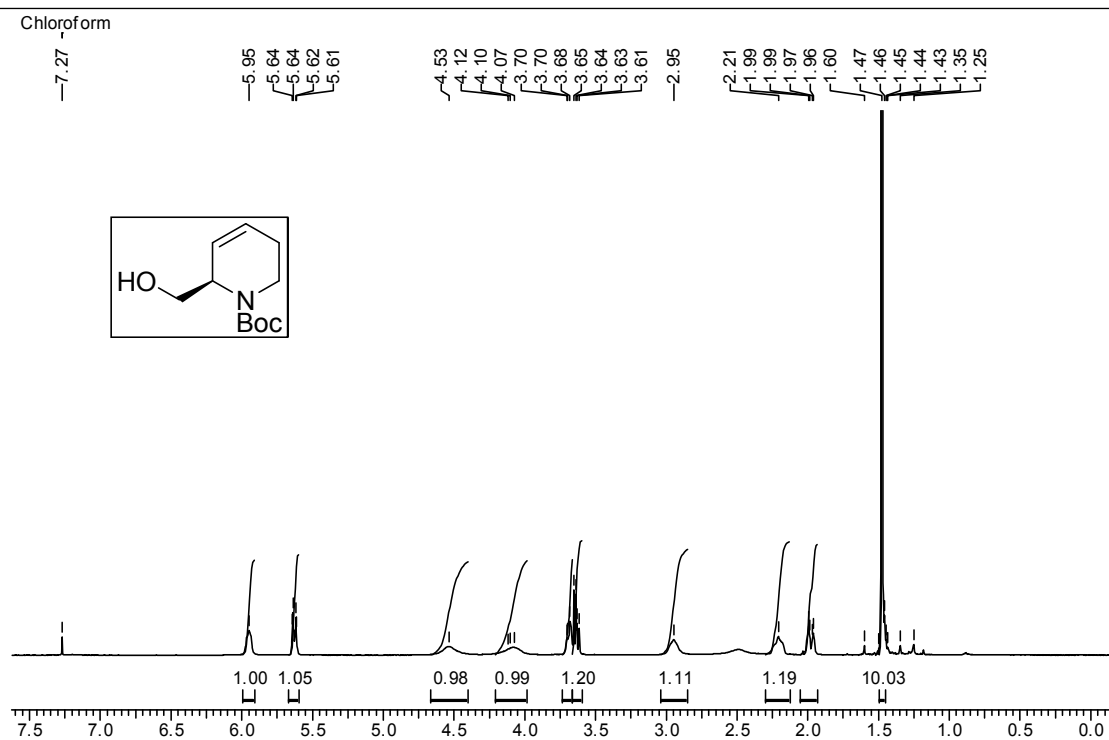

**<sup>13</sup>C NMR Spectrum of compound 8 (CDCl<sub>3</sub>+CCl<sub>4</sub>, 125 MHz)**

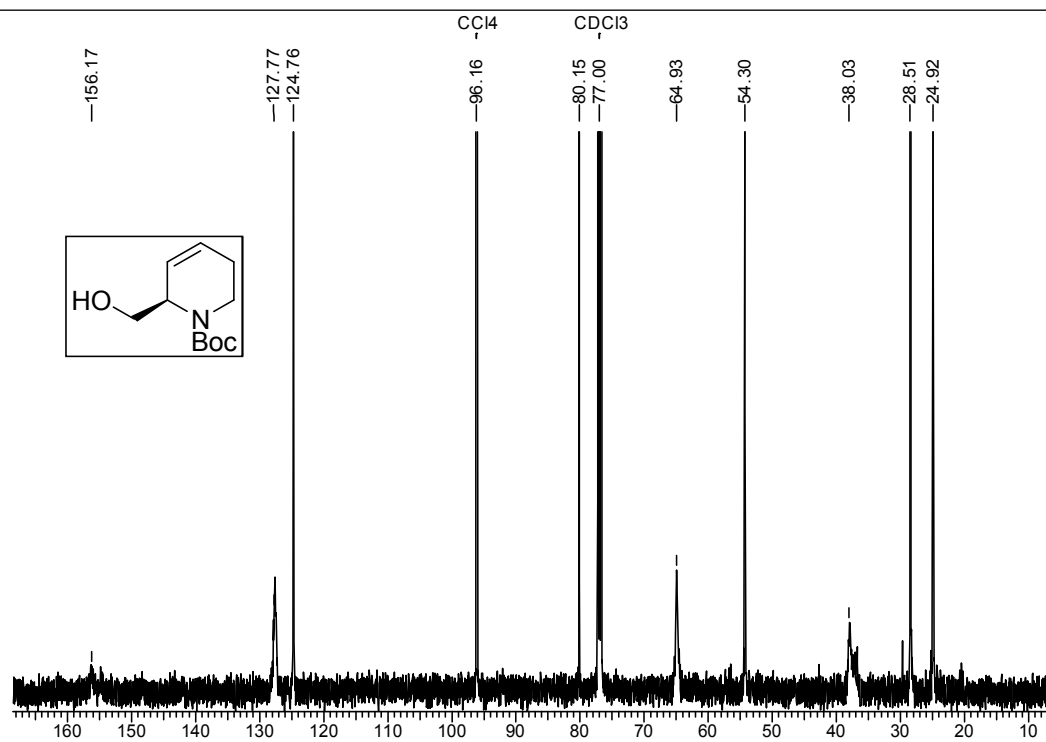

**DEPT Spectrum of compound 8 (CDCl<sub>3</sub>+CCl<sub>4</sub>, 125 MHz)**

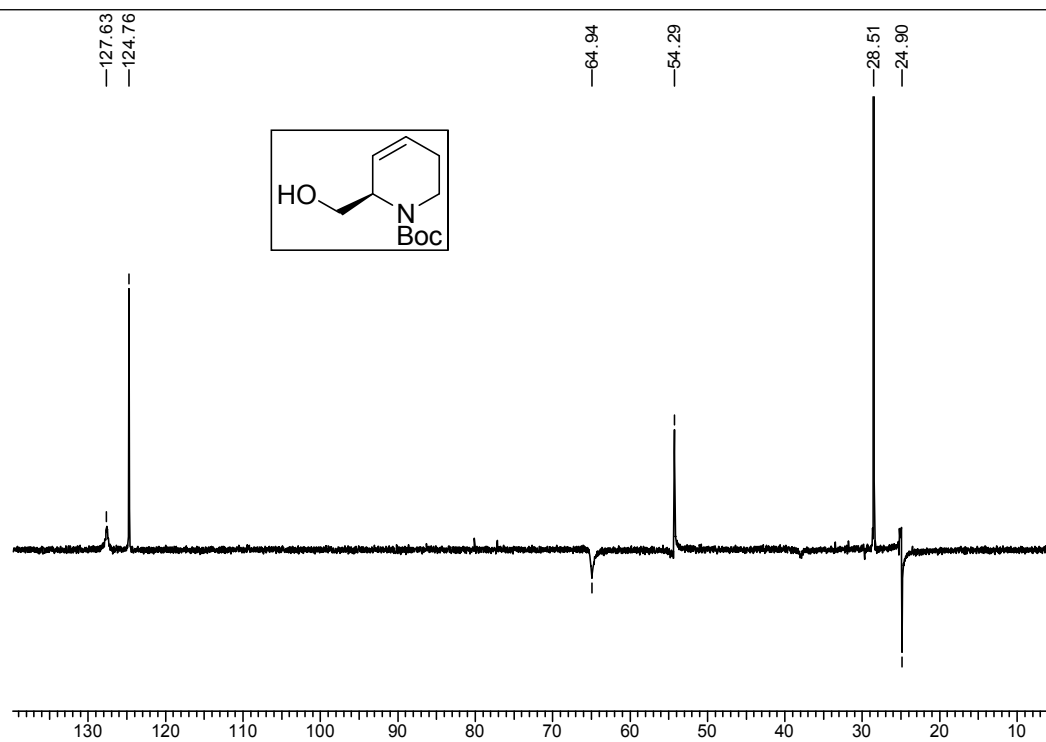

**<sup>1</sup>H NMR Spectrum of compound 17 (CDCl<sub>3</sub>+CCl<sub>4</sub>, 200 MHz)**

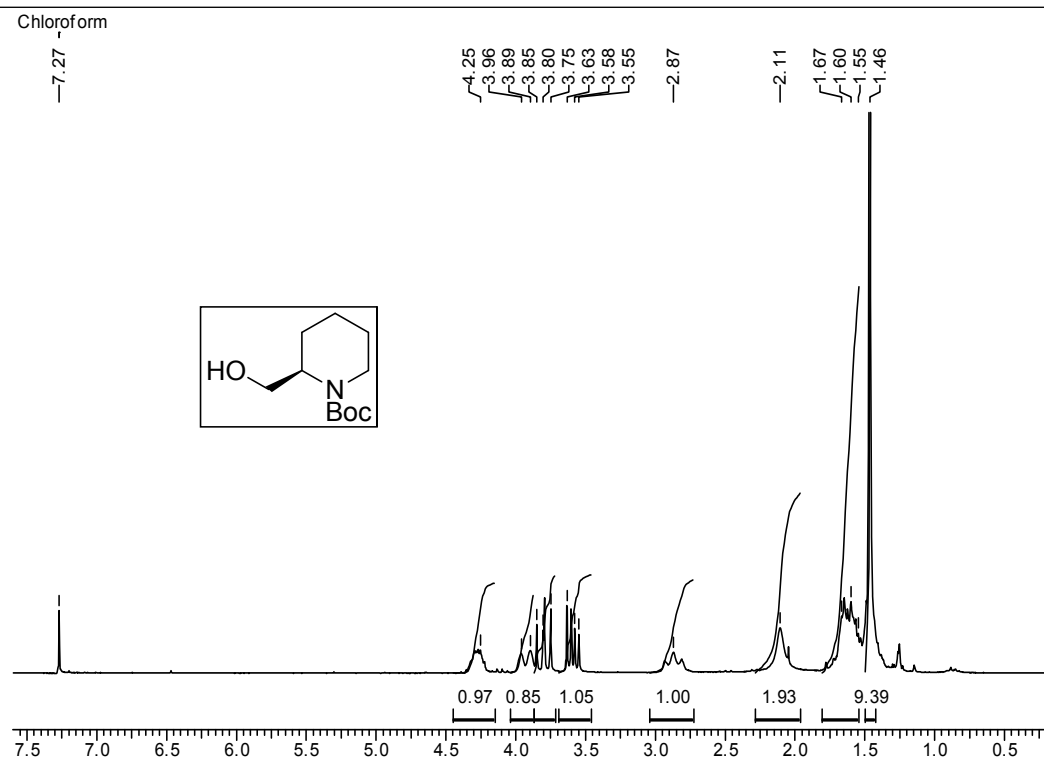

**<sup>13</sup>C NMR Spectrum of compound 17 (CDCl<sub>3</sub>+CCl<sub>4</sub>, 50 MHz)**

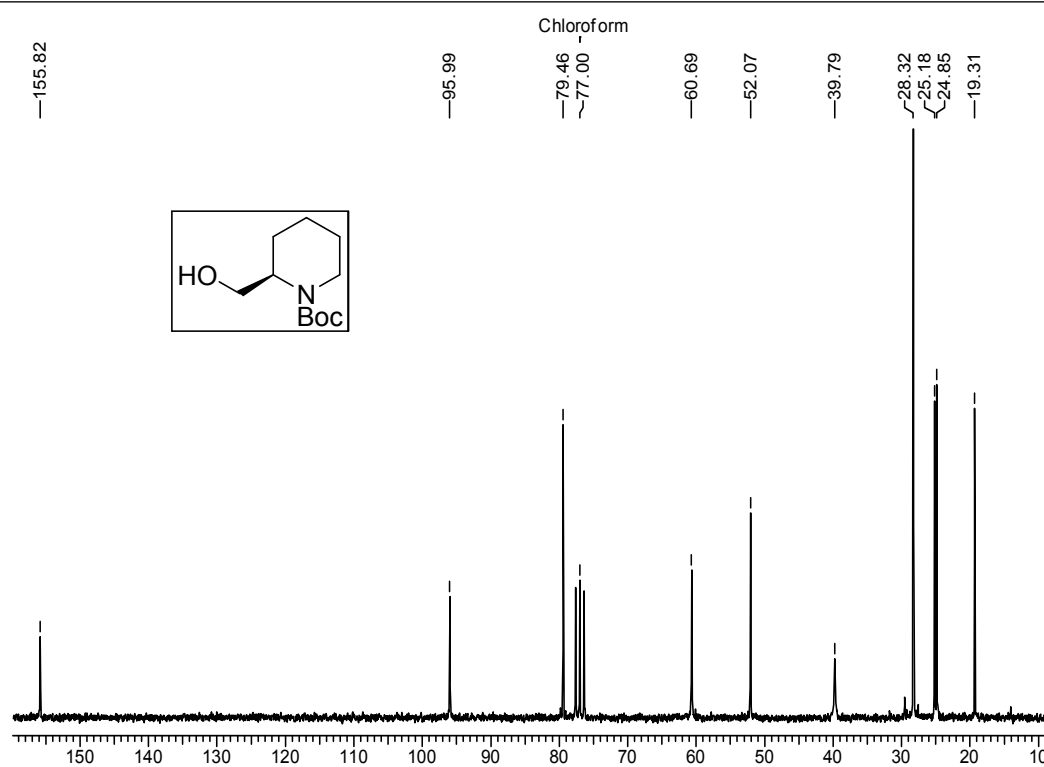

DEPT Spectrum of compound 17 (CDCl<sub>3</sub>+CCl<sub>4</sub>, 50 MHz)

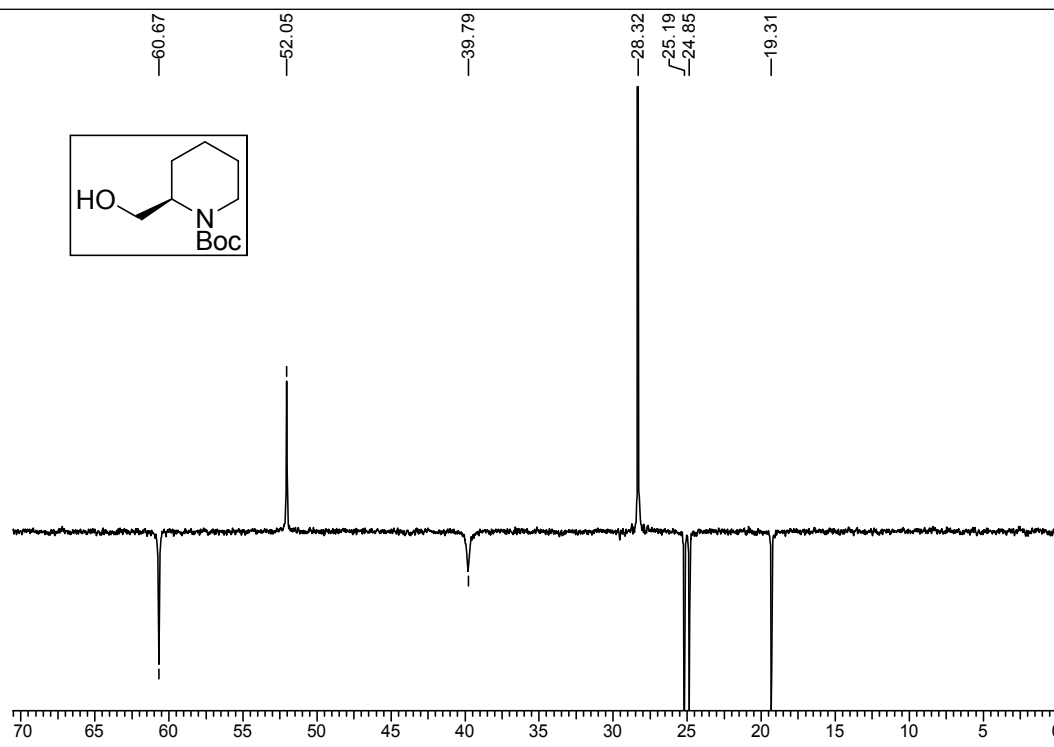

<sup>1</sup>H NMR Spectrum of compound 18 (CDCl<sub>3</sub>+CCl<sub>4</sub>, 200 MHz)

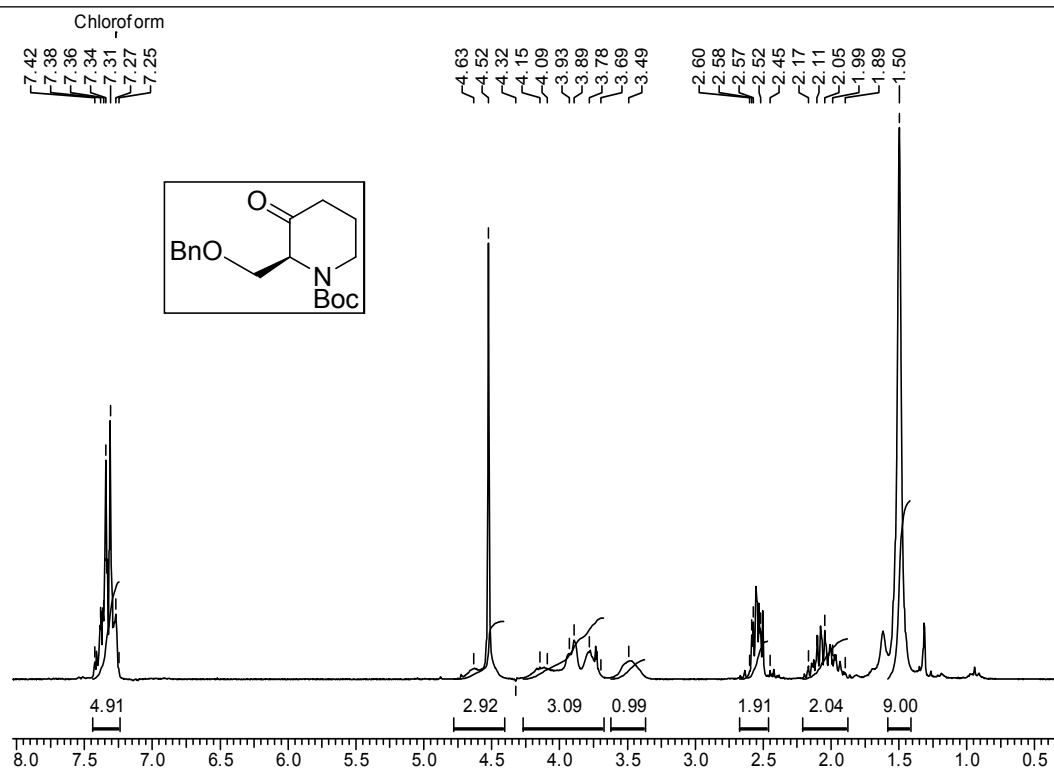

**$^{13}\text{C}$  NMR Spectrum of compound 18 ( $\text{CDCl}_3+\text{CCl}_4$ , 50 MHz)**

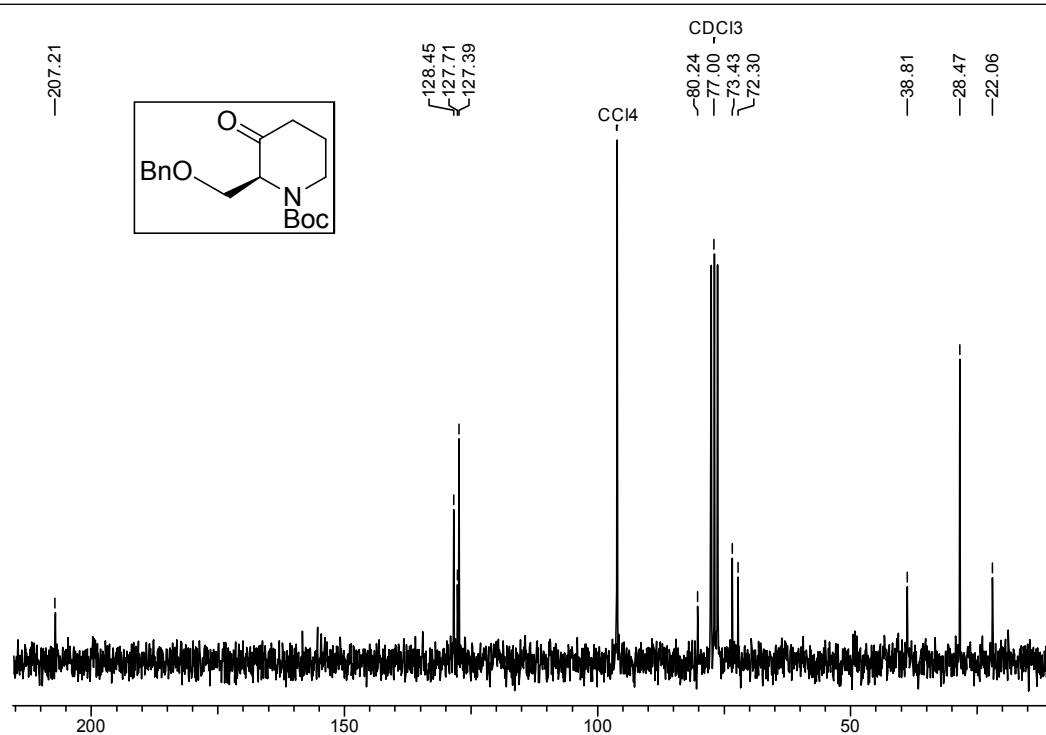

**DEPT Spectrum of compound 18 ( $\text{CDCl}_3+\text{CCl}_4$ , 50 MHz)**

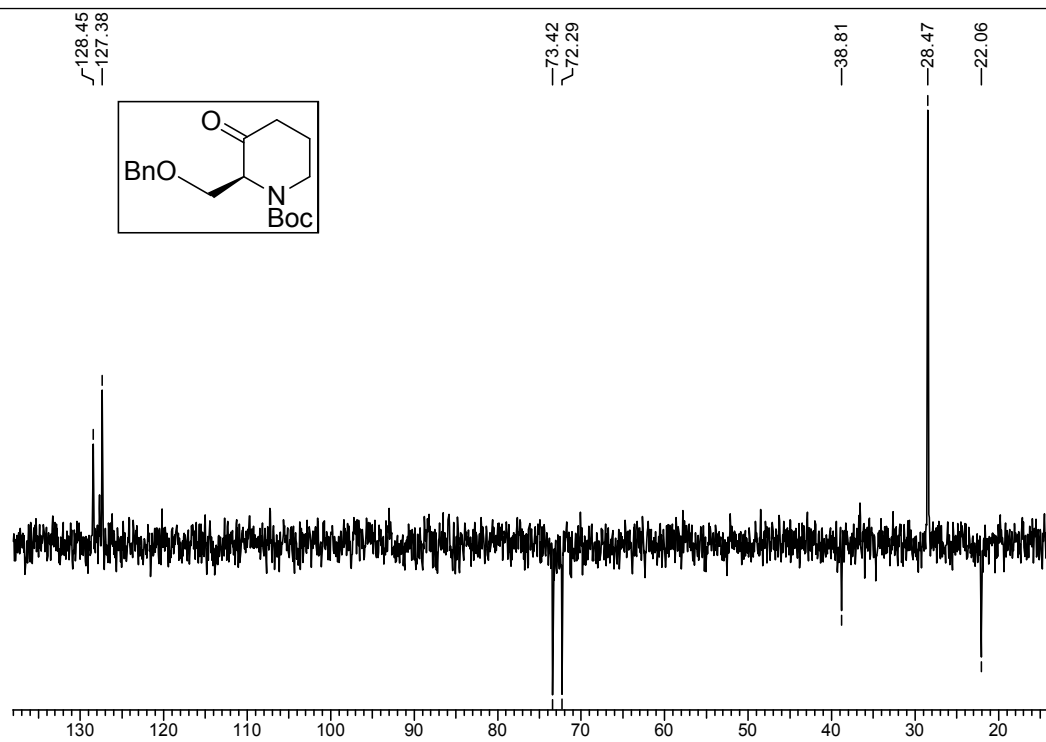

**<sup>1</sup>H NMR Spectrum of compound 19 (CDCl<sub>3</sub>+CCl<sub>4</sub>, 200 MHz)**

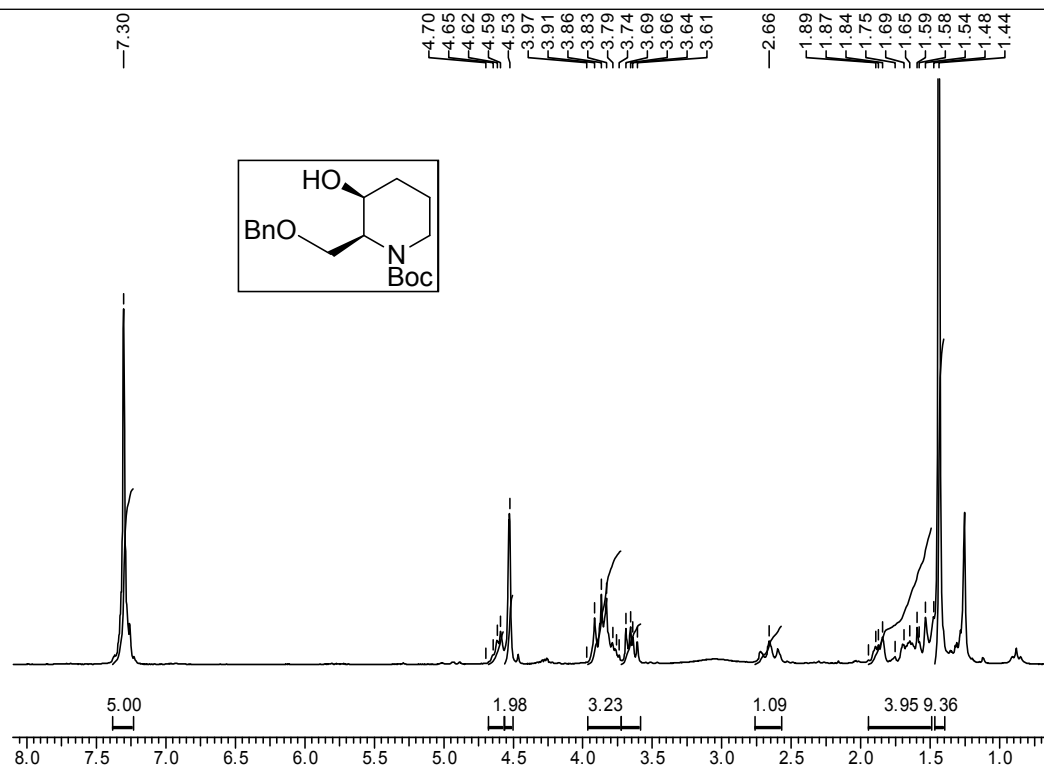

**<sup>13</sup>C NMR Spectrum of compound 19 (CDCl<sub>3</sub>+CCl<sub>4</sub>, 100 MHz)**

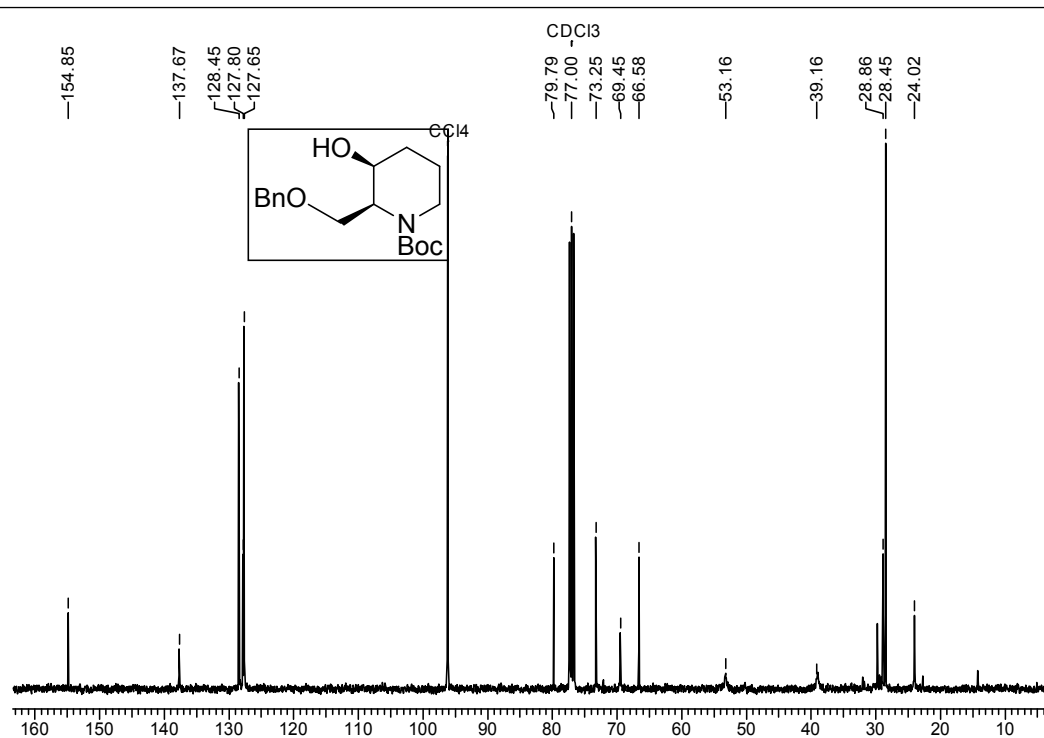



DEPT Spectrum of compound 19 (CDCl<sub>3</sub>+CCl<sub>4</sub>, 100 MHz)

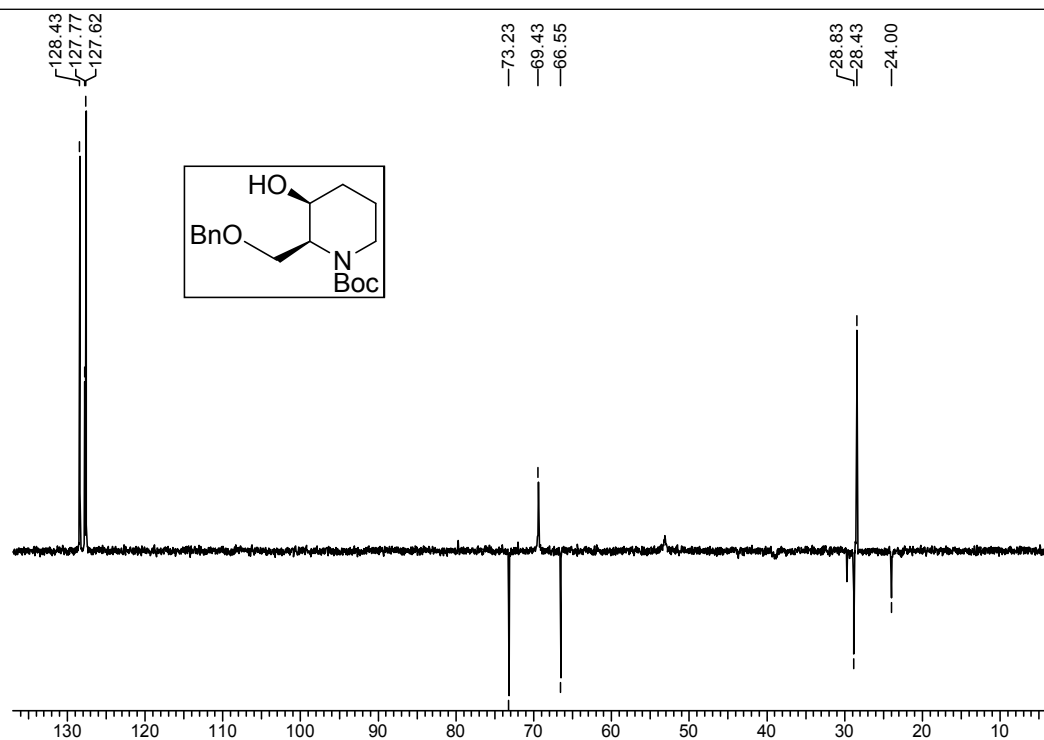

<sup>1</sup>H NMR Spectrum of compound 21 (CDCl<sub>3</sub>+CCl<sub>4</sub>, 400 MHz)

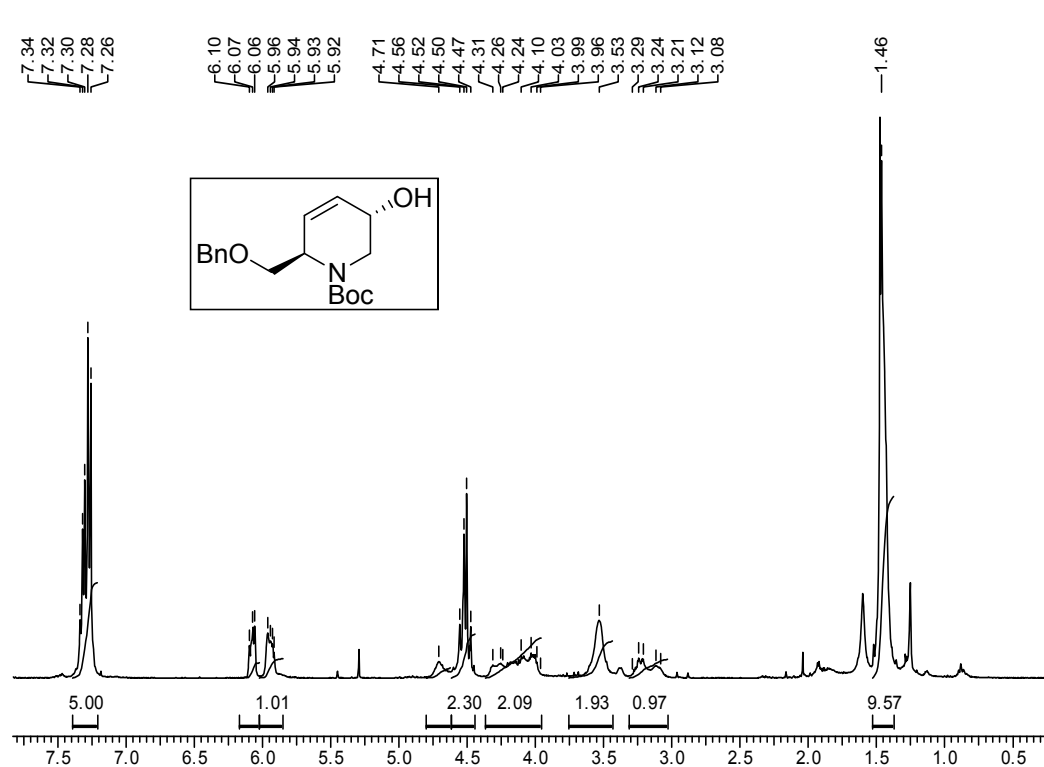

**<sup>13</sup>C NMR Spectrum of compound 21 (CDCl<sub>3</sub>+CCl<sub>4</sub>, 100 MHz)**

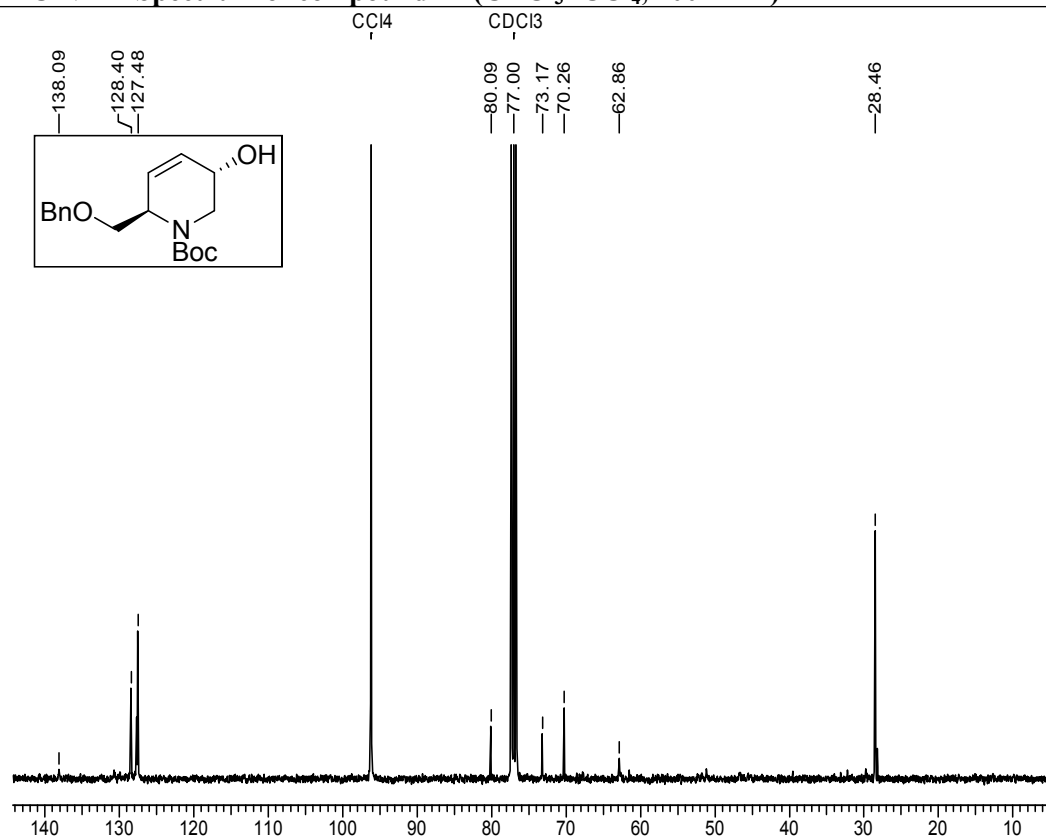

**DEPT Spectrum of compound 21 (CDCl<sub>3</sub>+CCl<sub>4</sub>, 100 MHz)**

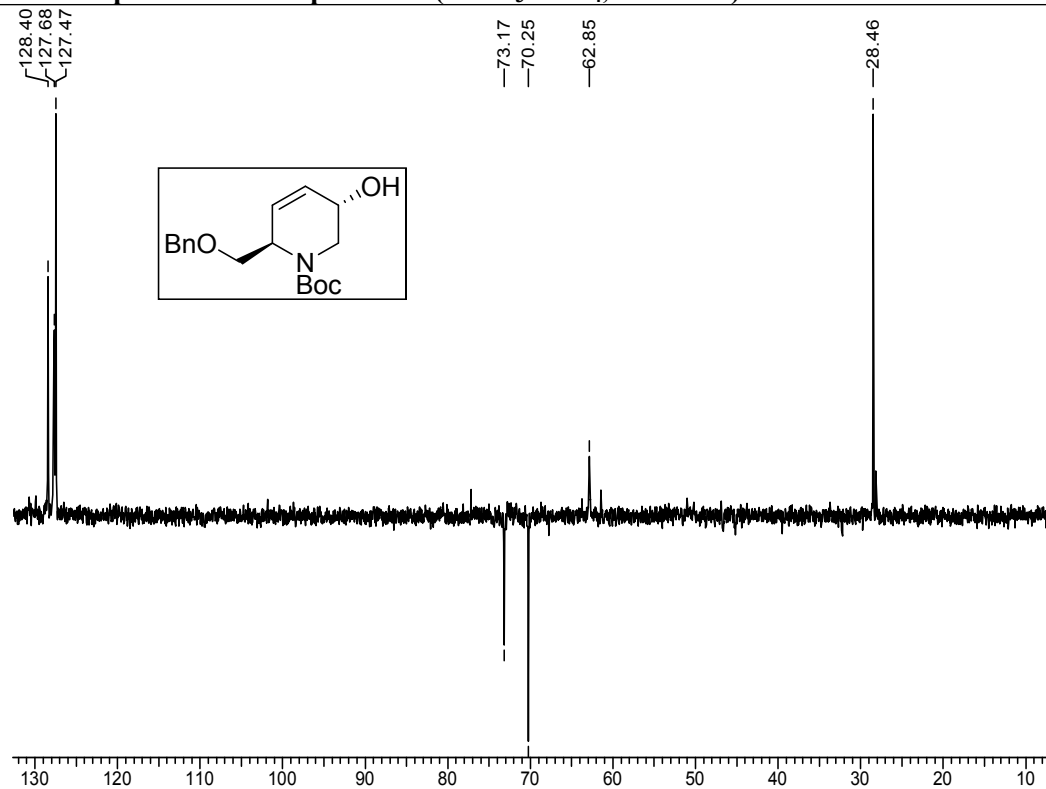

**<sup>1</sup>H NMR Spectrum of compound 22 (CDCl<sub>3</sub>+CCl<sub>4</sub>, 500 MHz)**

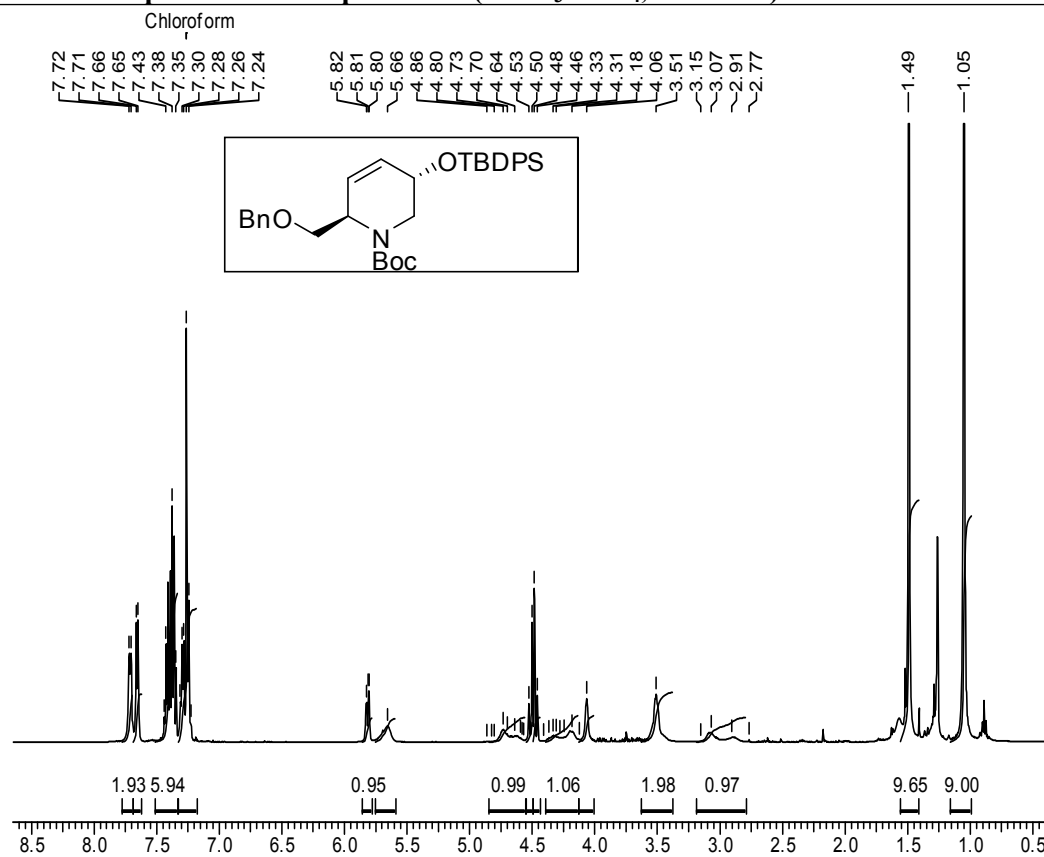

**<sup>13</sup>C NMR Spectrum of compound 22 (CDCl<sub>3</sub>+CCl<sub>4</sub>, 125 MHz)**

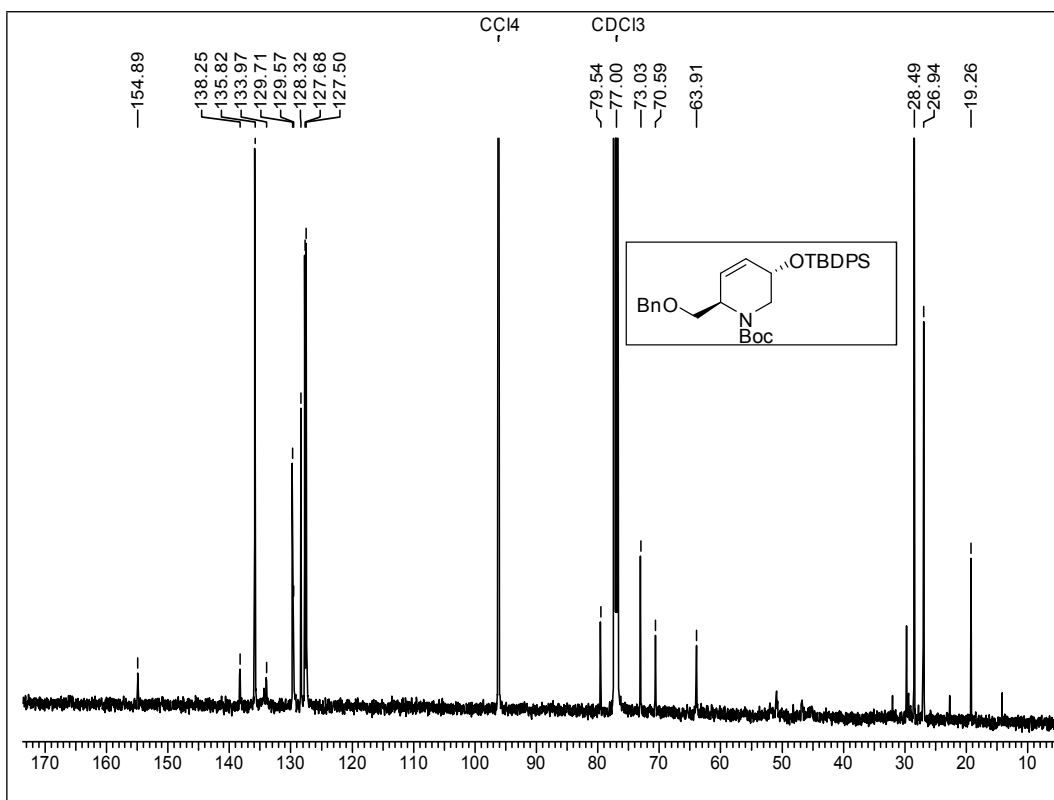

**DEPT Spectrum of compound 22 (CDCl<sub>3</sub>+CCl<sub>4</sub>, 125 MHz)**

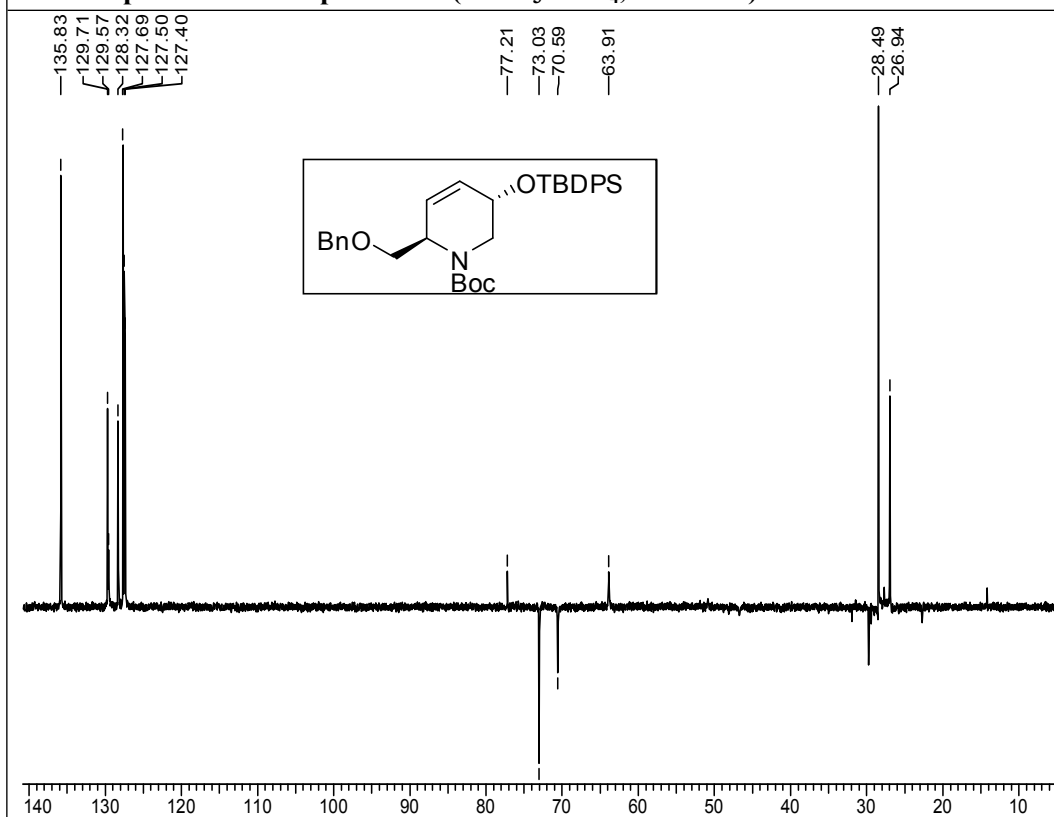

**<sup>1</sup>H NMR Spectrum of compound 24 (CDCl<sub>3</sub>+CCl<sub>4</sub>, 200 MHz)**

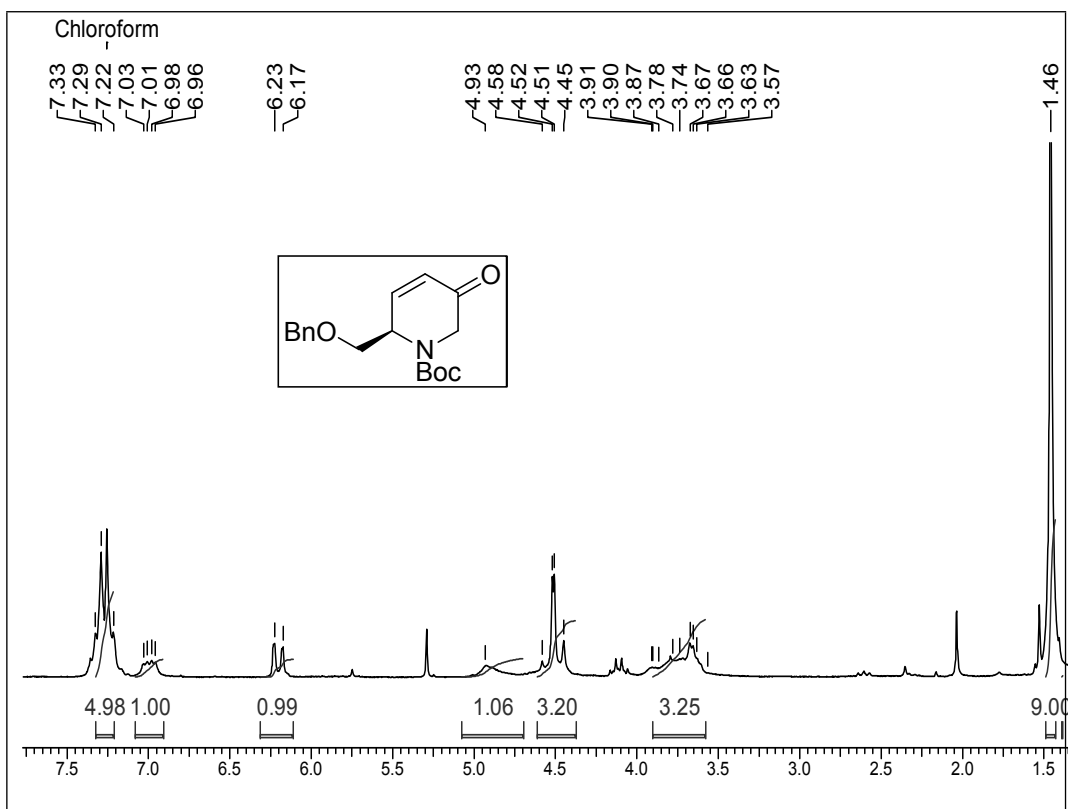

**$^{13}\text{C}$  NMR Spectrum of compound 24 ( $\text{CDCl}_3 + \text{CCl}_4$ , 100 MHz)**

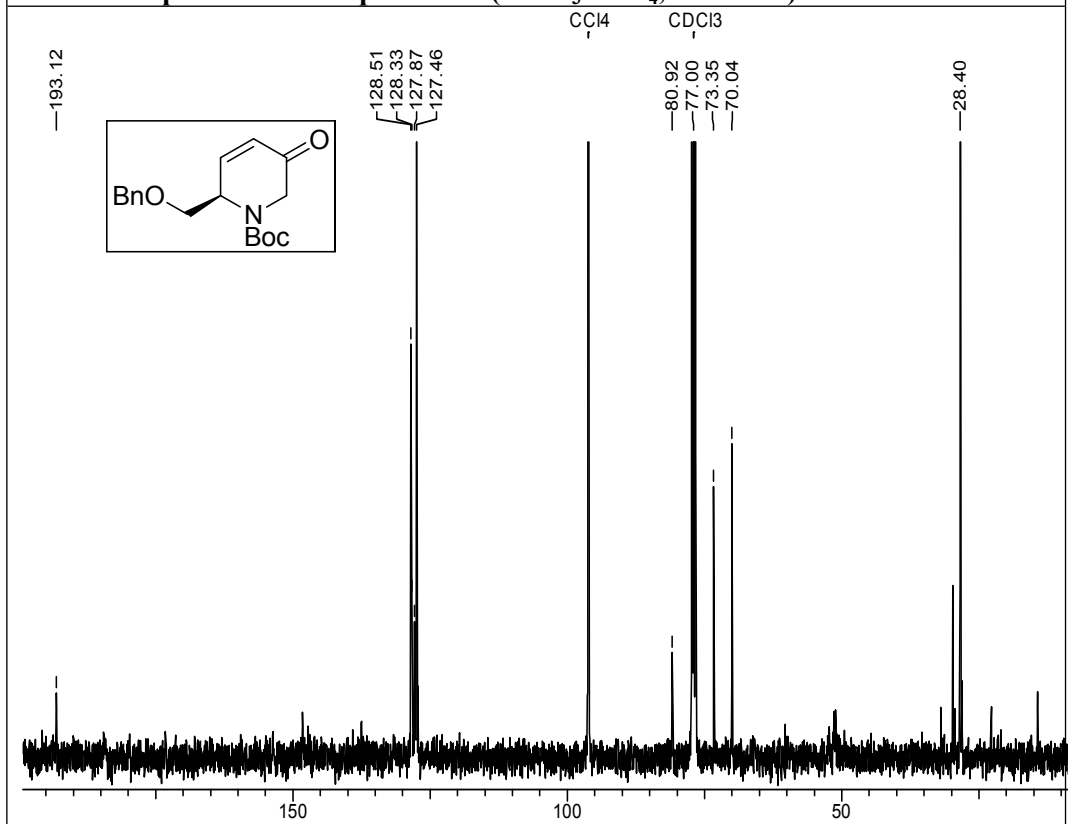

**$^1\text{H}$  NMR Spectrum of compound 23 ( $\text{CDCl}_3 + \text{CCl}_4$ , 500 MHz)**

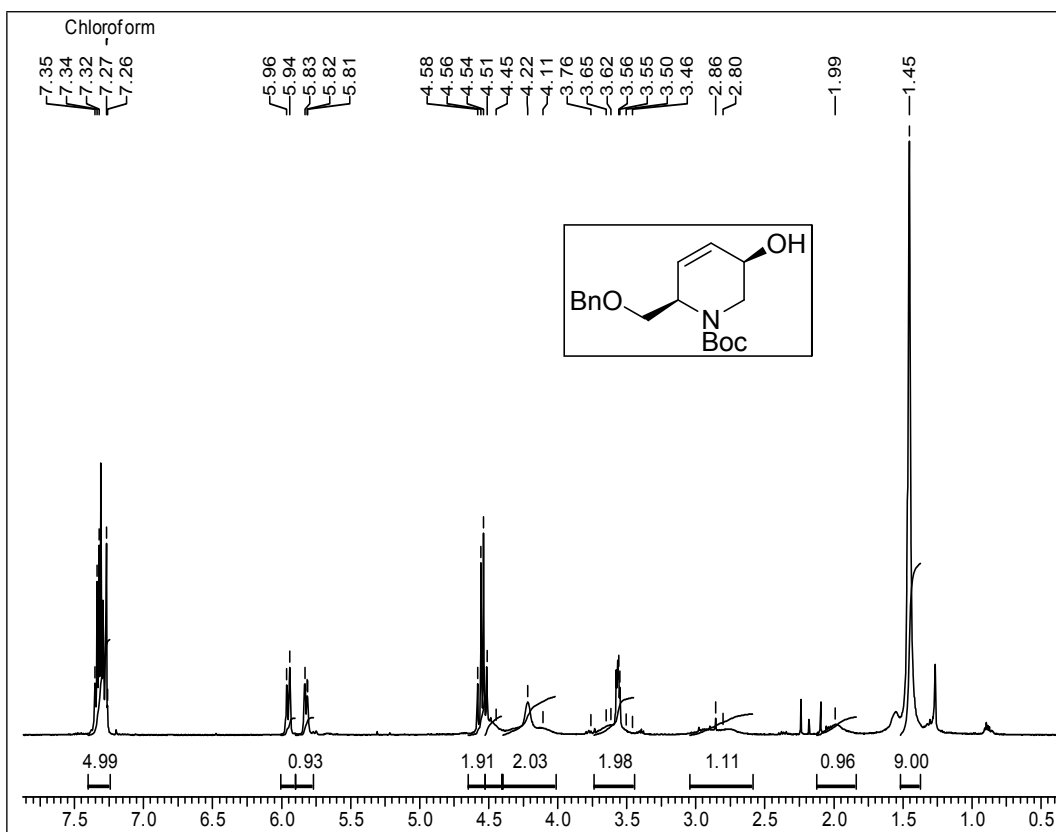

**$^{13}\text{C}$  NMR Spectrum of compound 23 ( $\text{CDCl}_3 + \text{CCl}_4$ , 125 MHz)**

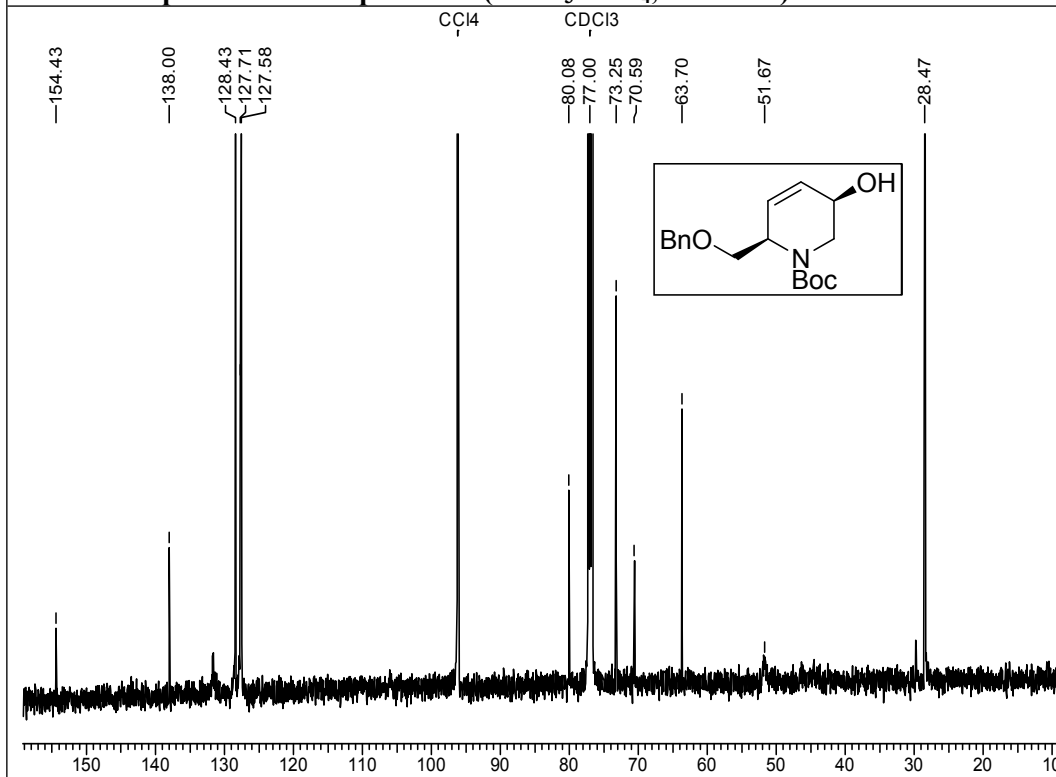

**DEPT Spectrum of compound 23 ( $\text{CDCl}_3 + \text{CCl}_4$ , 125 MHz)**

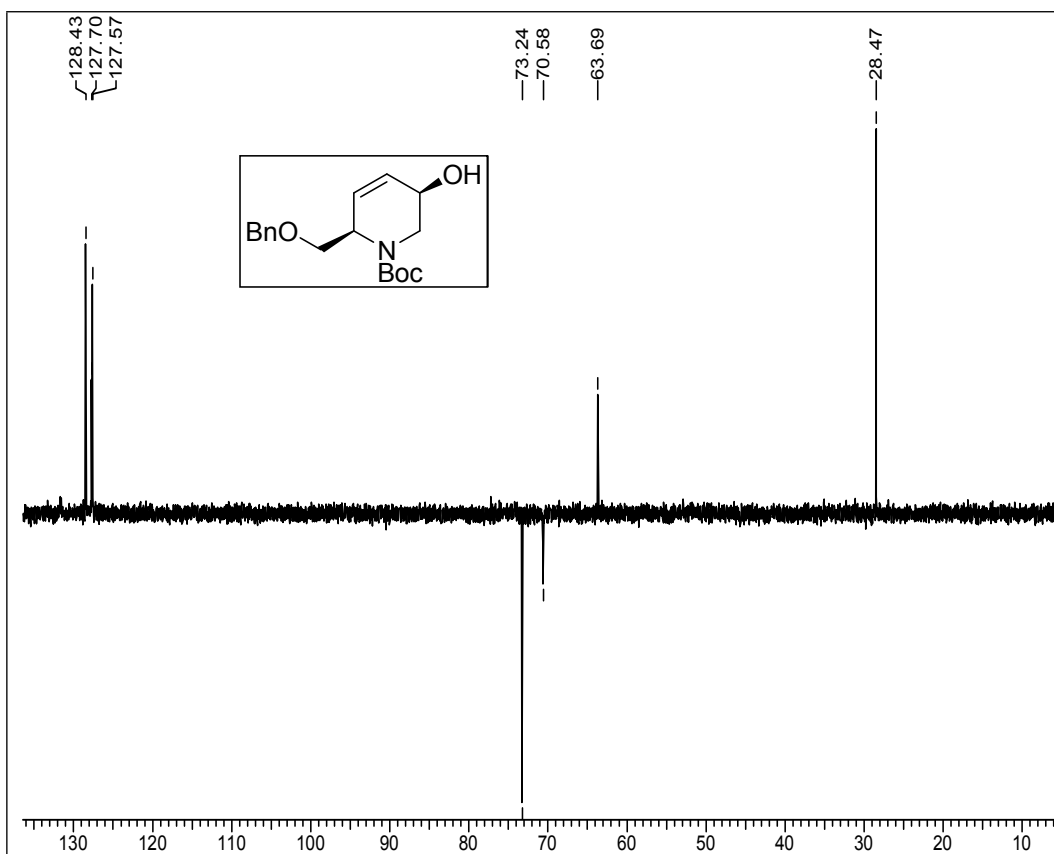

**<sup>1</sup>H NMR Spectrum of compound 25 (CDCl<sub>3</sub>+CCl<sub>4</sub>, 500 MHz)**

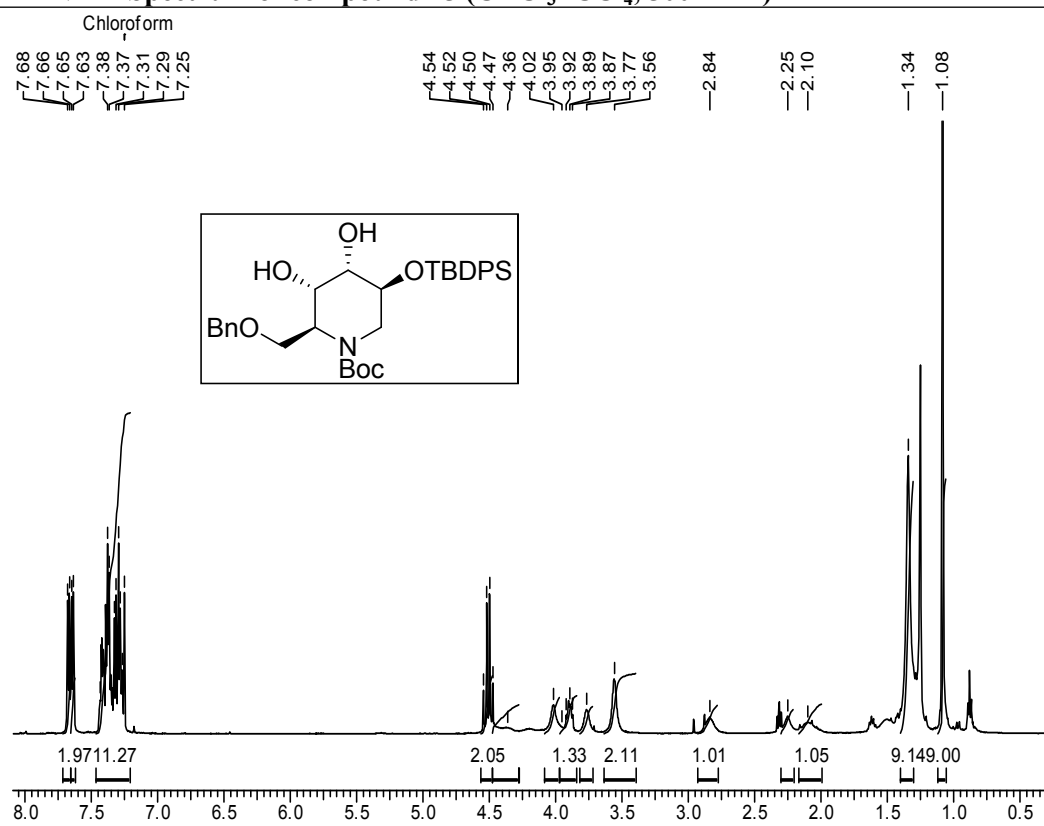

**<sup>13</sup>C NMR Spectrum of compound 25 (CDCl<sub>3</sub>+CCl<sub>4</sub>, 125 MHz)**

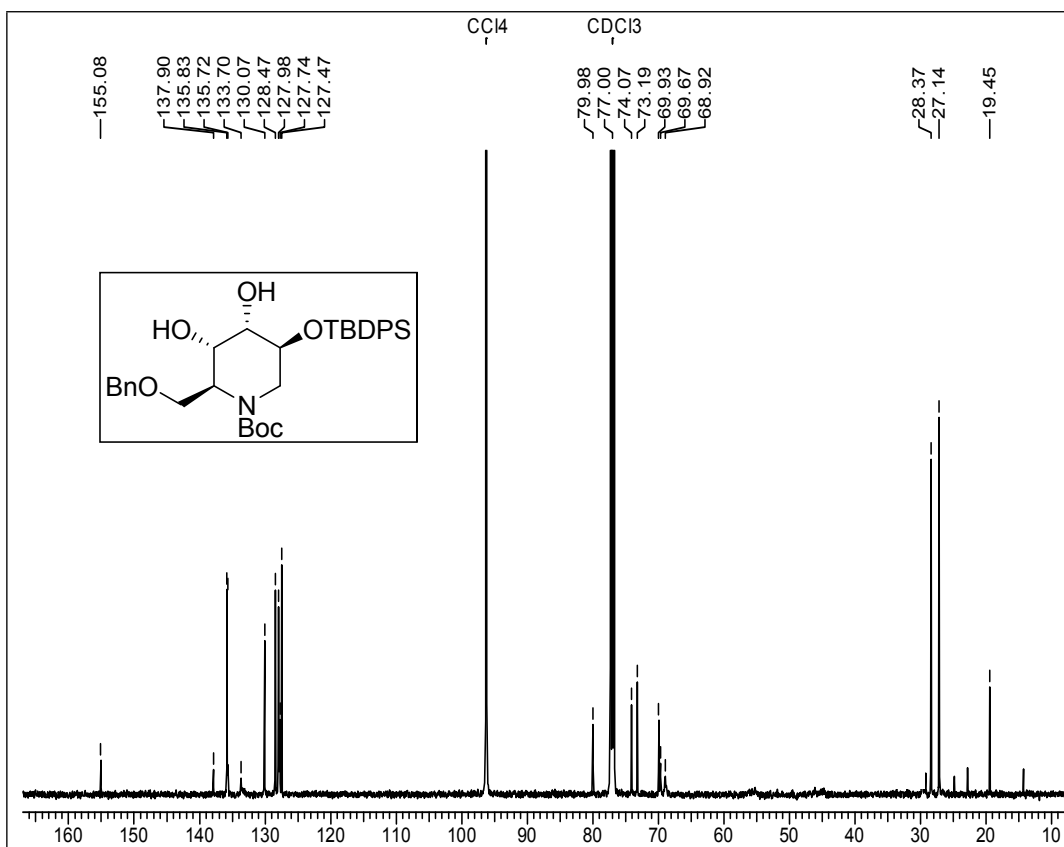

**DEPT Spectrum of compound 25 (CDCl<sub>3</sub>+CCl<sub>4</sub>, 125 MHz)**

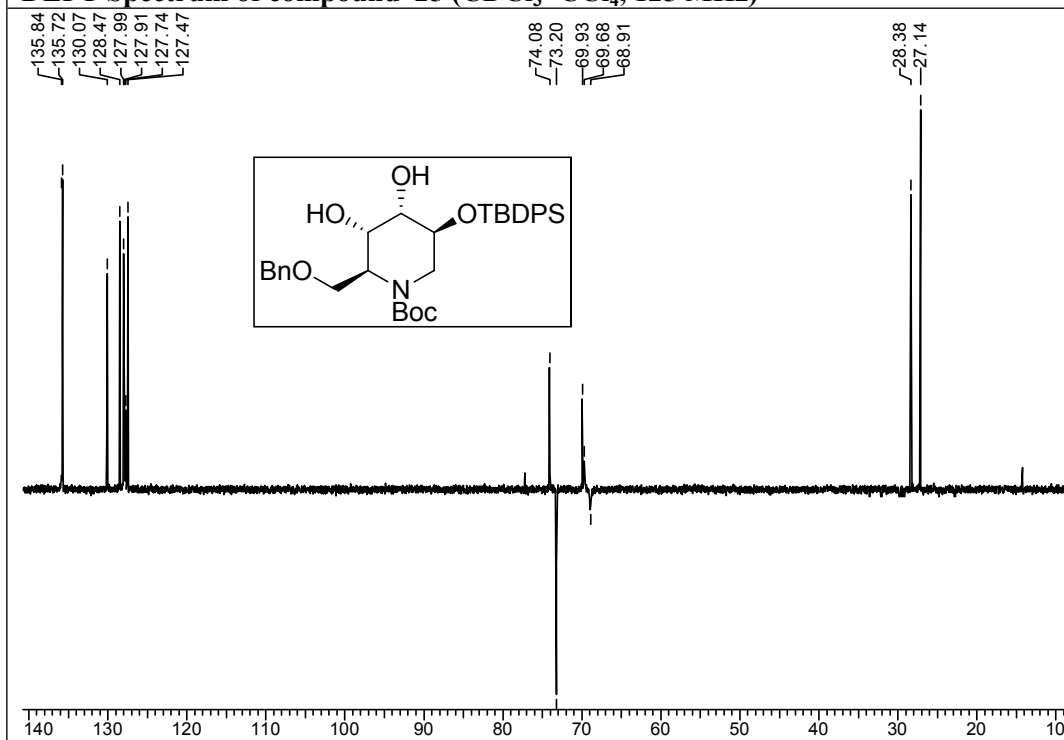



### HPLC Chromatograms

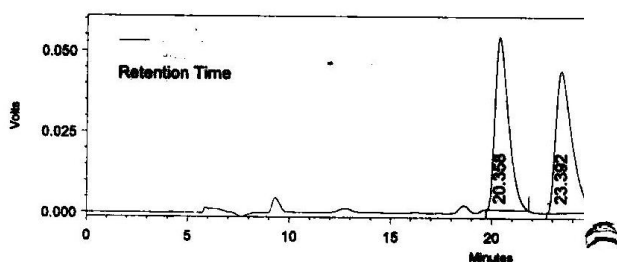

Project Leader : Dr.S P Chavan  
 Column : Chiralcel OD-H (250x4.6mm)  
 Mobile Phase :IPA:Petether: (20:80)  
 Wavelength : 254nm  
 Flow Rate : 0.5ml/min (26kgf)  
 Sample Con : 1mg/1ml Inj vol-20ul

Kunte

Detector A - 1 (254nm)

| PK # | Retention Time | Area    | Area %  |
|------|----------------|---------|---------|
| 1    | 20.358         | 2452872 | 49.993  |
| 2    | 23.392         | 2453535 | 50.007  |
|      |                | 4906407 | 100.000 |

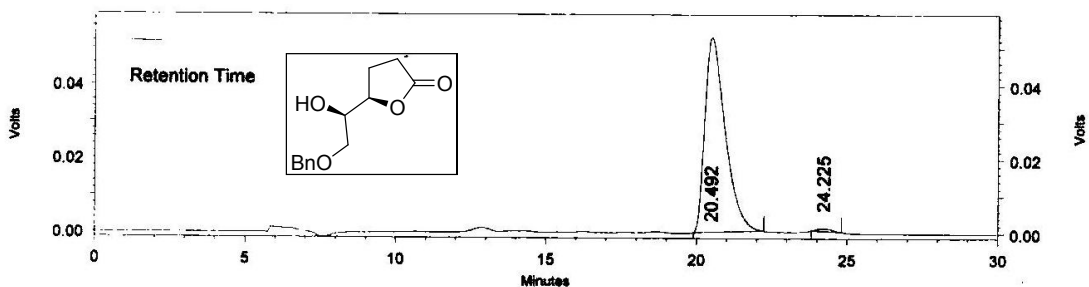

Detector A - 1 (254nm)

| PK #          | Retention Time | Area           | Area %         |
|---------------|----------------|----------------|----------------|
| 1             | 20.492         | 2487393        | 98.885         |
| 2             | 24.225         | 28051          | 1.115          |
| <b>Totals</b> |                | <b>2515444</b> | <b>100.000</b> |

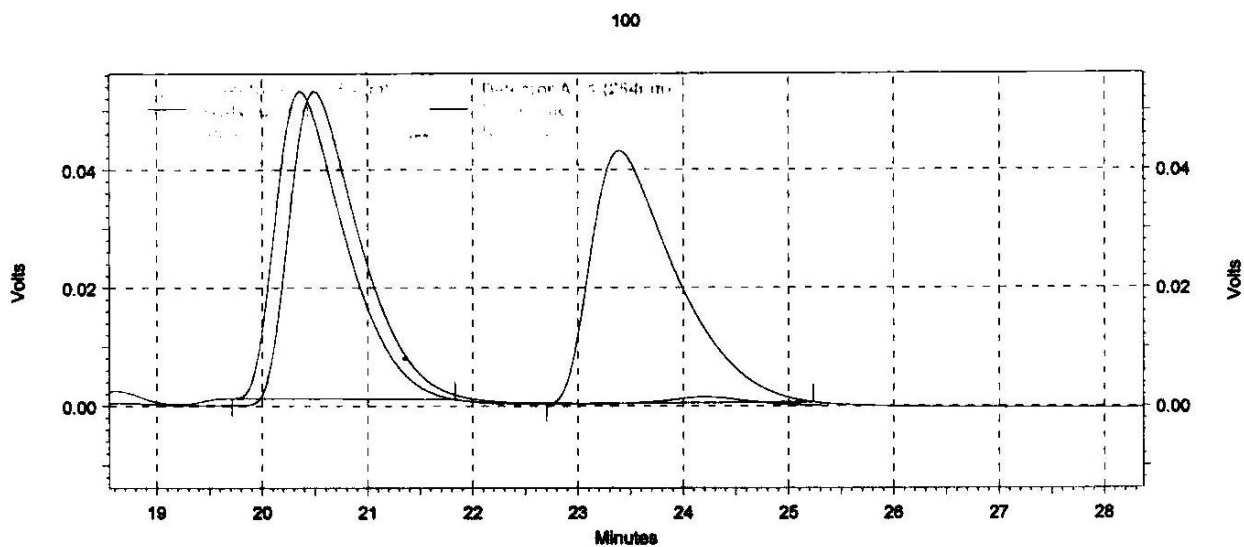

— C:\CLASS-VP\Data\Dr. CHAVAN S. PWB 1013, Detector A - 1 (254nm)

— C:\CLASS-VP\Data\Dr. CHAVAN S. PWB 1012, Detector A - 1 (254nm)

Project Leader :- Dr. S P Chavan  
 Column :-Kromasil 5-AmyCoat (250 x 4.6mm)  
 M.Phase :-IPA:PE (4:96)  
 Wavelength :- 200 nm  
 Flow :- 0.5ml/min (288psi)  
 conc. :- 4mg/ 1 ml  
 Injection vol :- 5 ul

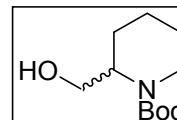

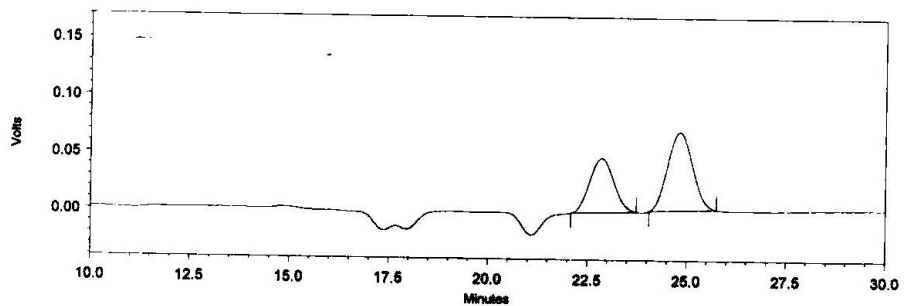

Detector A - 1 (200nm)

| Pk #          | Retention Time | Area           | Area %         |
|---------------|----------------|----------------|----------------|
| 1             | 22.858         | 2005440        | 40.105         |
| 2             | 24.825         | 2994974        | 59.895         |
| <b>Totals</b> |                | <b>5000414</b> | <b>100.000</b> |

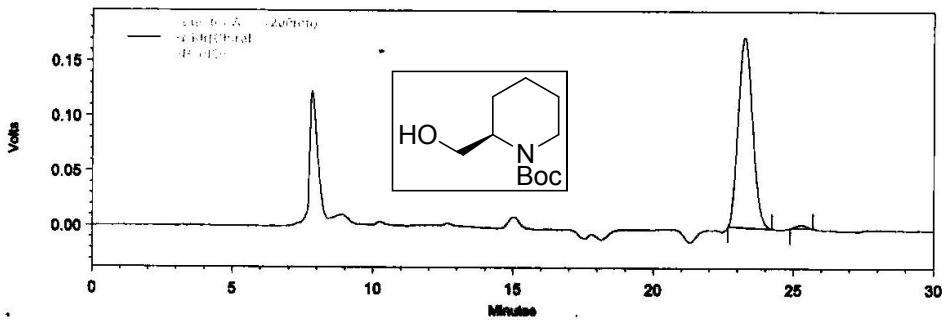

Detector A - 1 (200nm)

| Pk # | Retention Time | Area    | Area % |
|------|----------------|---------|--------|
| 1    | 23.250         | 6194327 | 98.565 |
| 2    | 25.258         | 90176   | 1.435  |

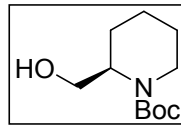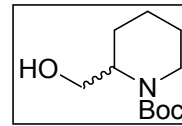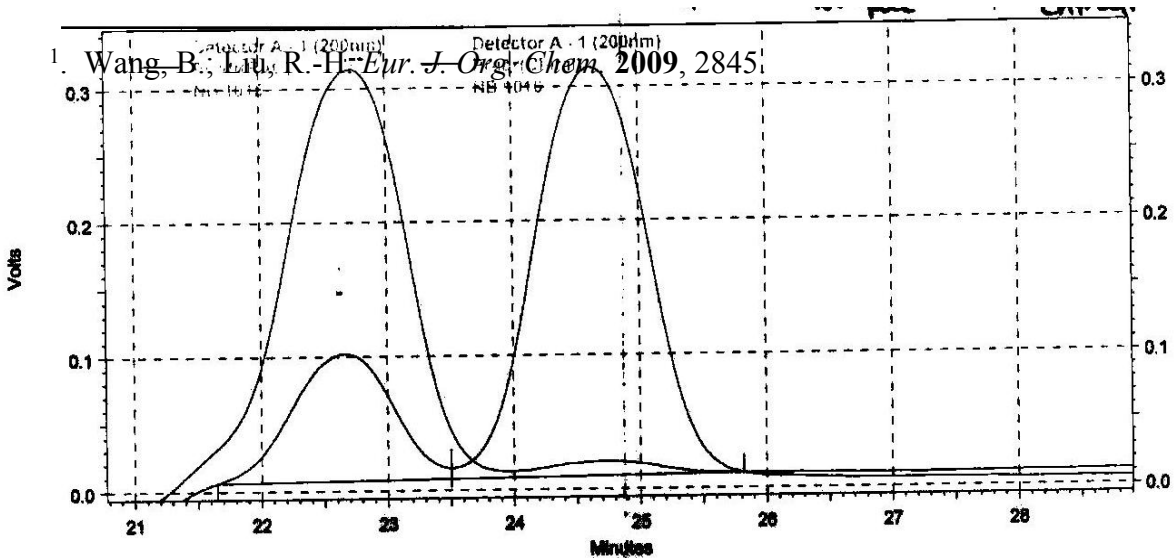

— C:\CLASS-VP\Data\Dr. CHAVAN S. PNB 1015, Detector A - 1 (200nm)

— C:\CLASS-VP\Data\Dr. CHAVAN S. PNB 1016, Detector A - 1 (200nm)
